# Supplementary material
Source: PubMed Central journal article supplement (PMC3608413)

Pd-Catalyzed Organozinc Chemistry Enabled by Micellar  
Catalysis. Cross-Couplings Between Alkyl and Aryl  
Bromides in Water at Room Temperature

*Christophe Duplais, Arkady Krasovskiy, and Bruce H. Lipshutz\**

Department of Chemistry & Biochemistry, University of California, Santa Barbara, CA 93106

E-mail: lipshutz@chem.ucsb.edu

Supporting Information

Table of Contents

<sup>1</sup>H, <sup>13</sup>C NMR Data

S2-S24

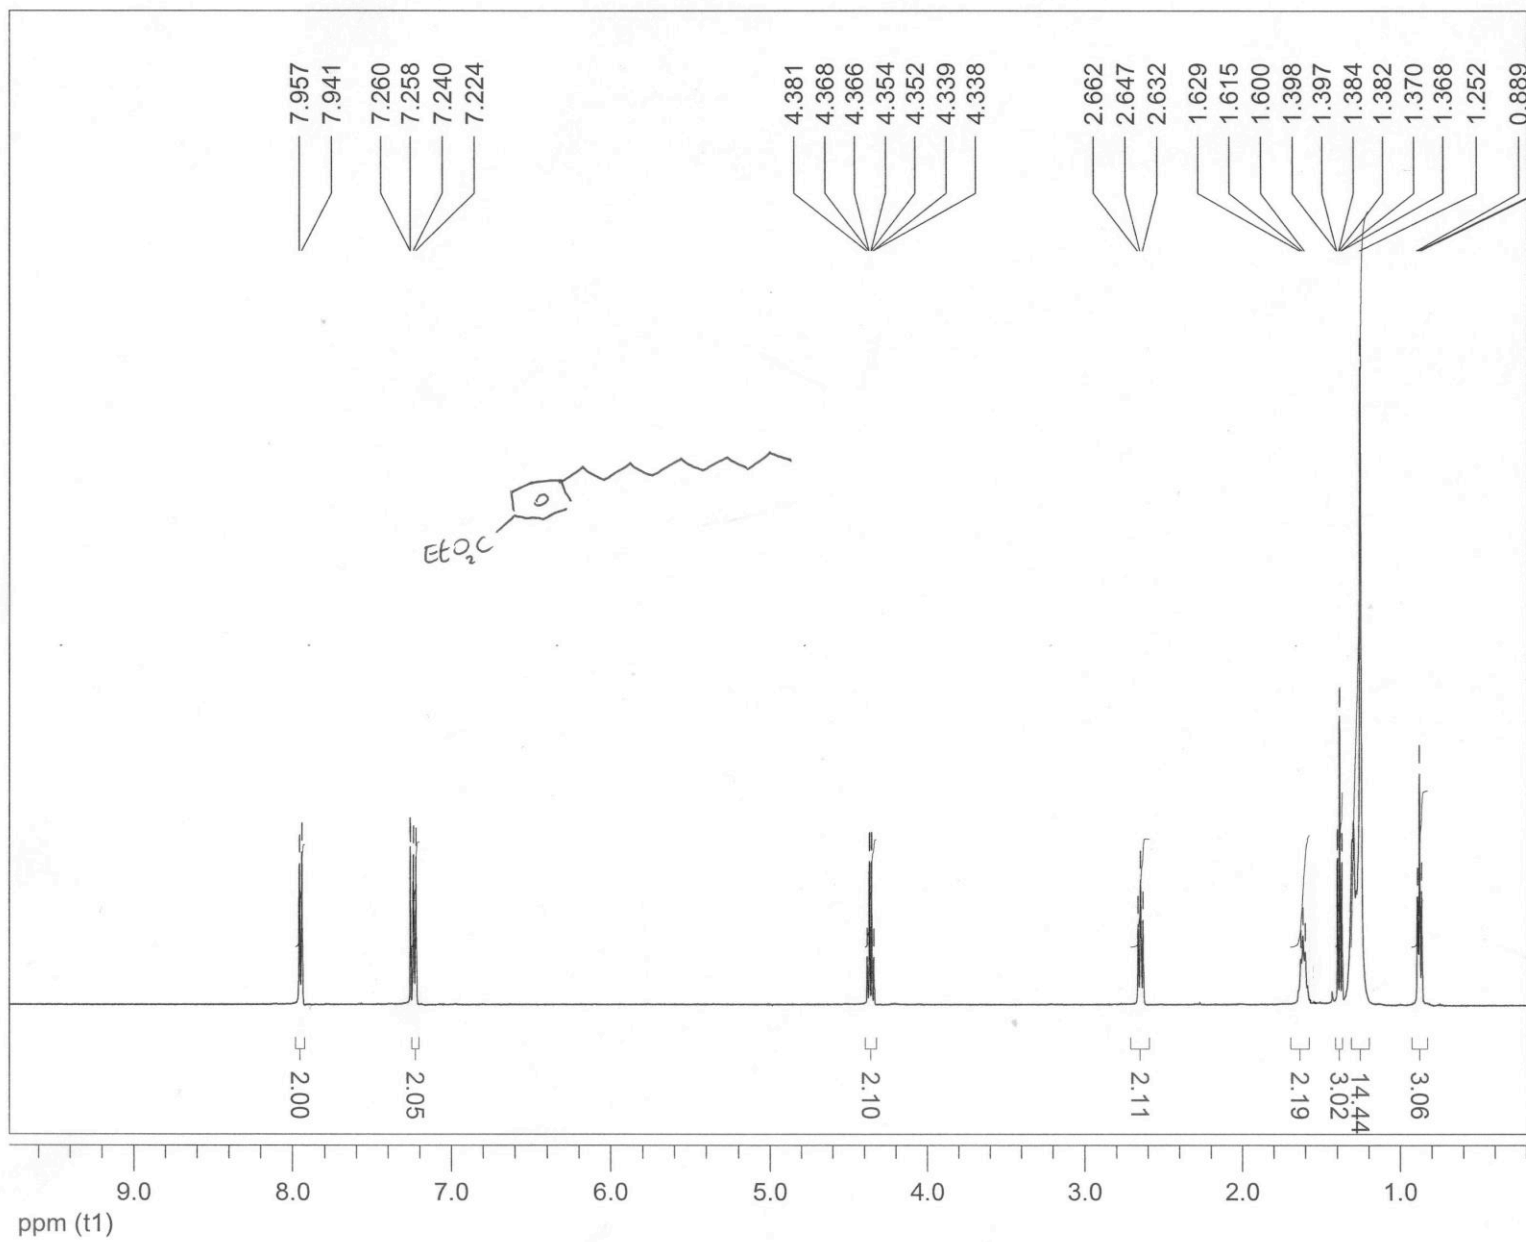

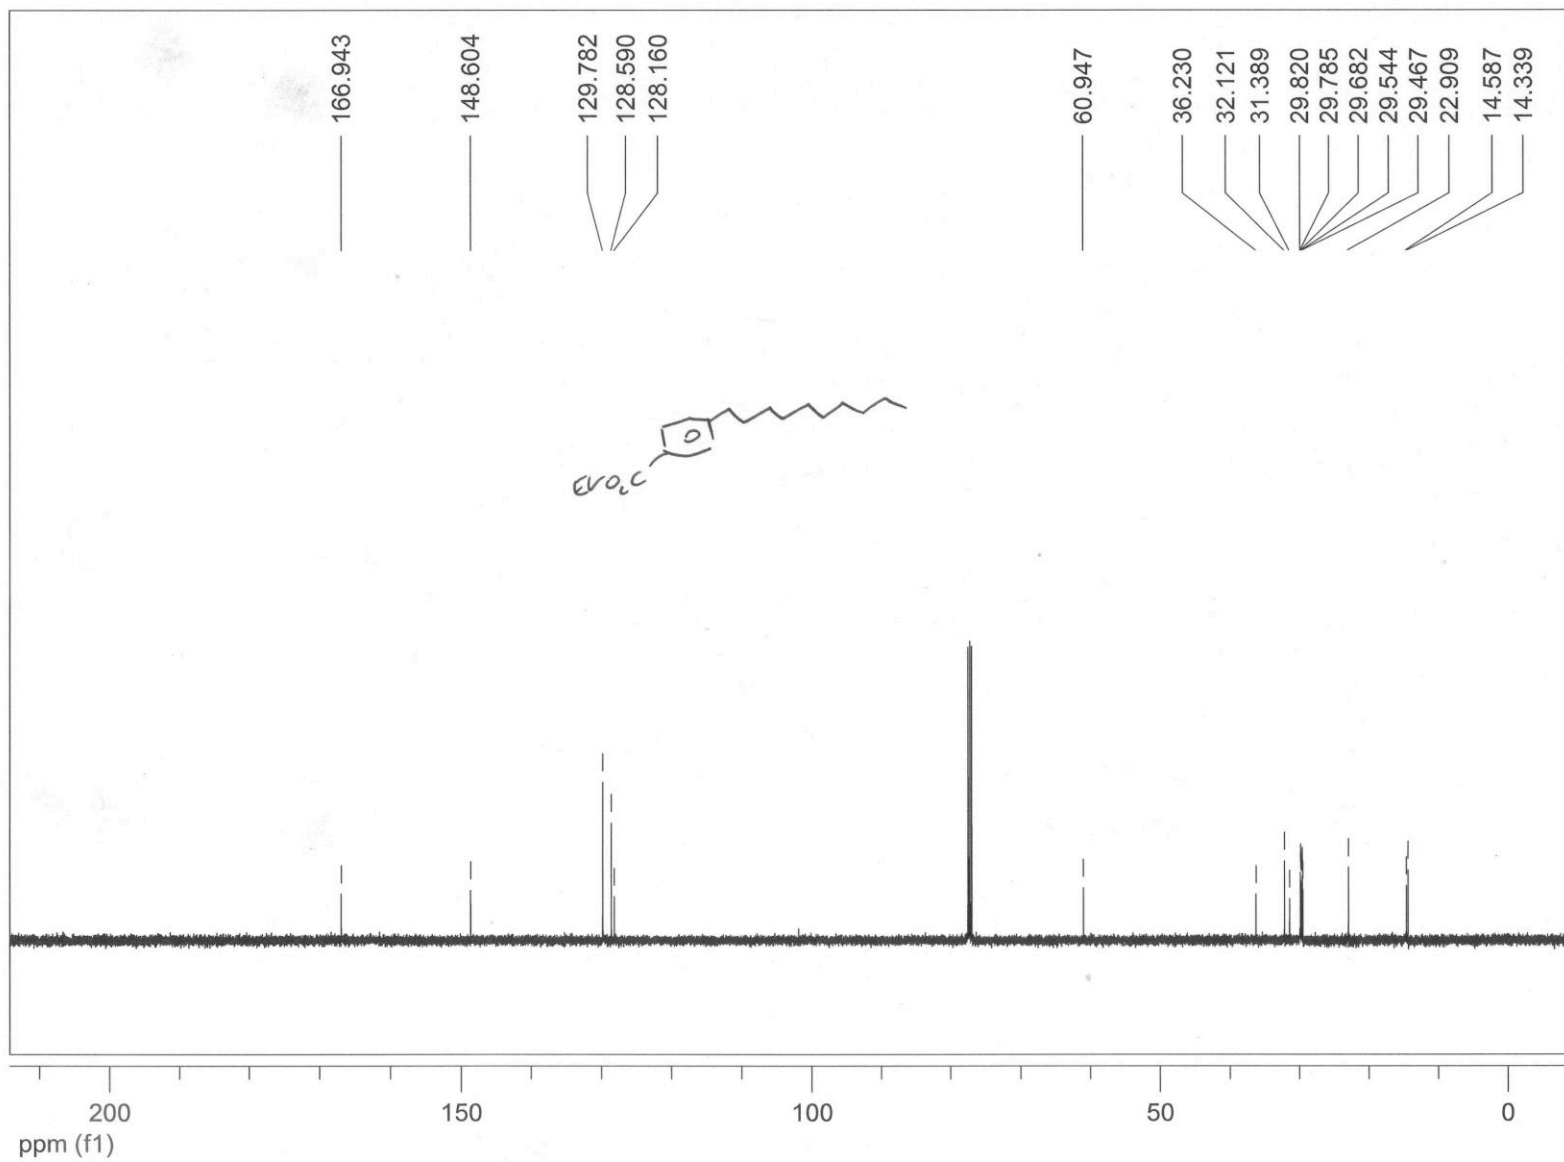

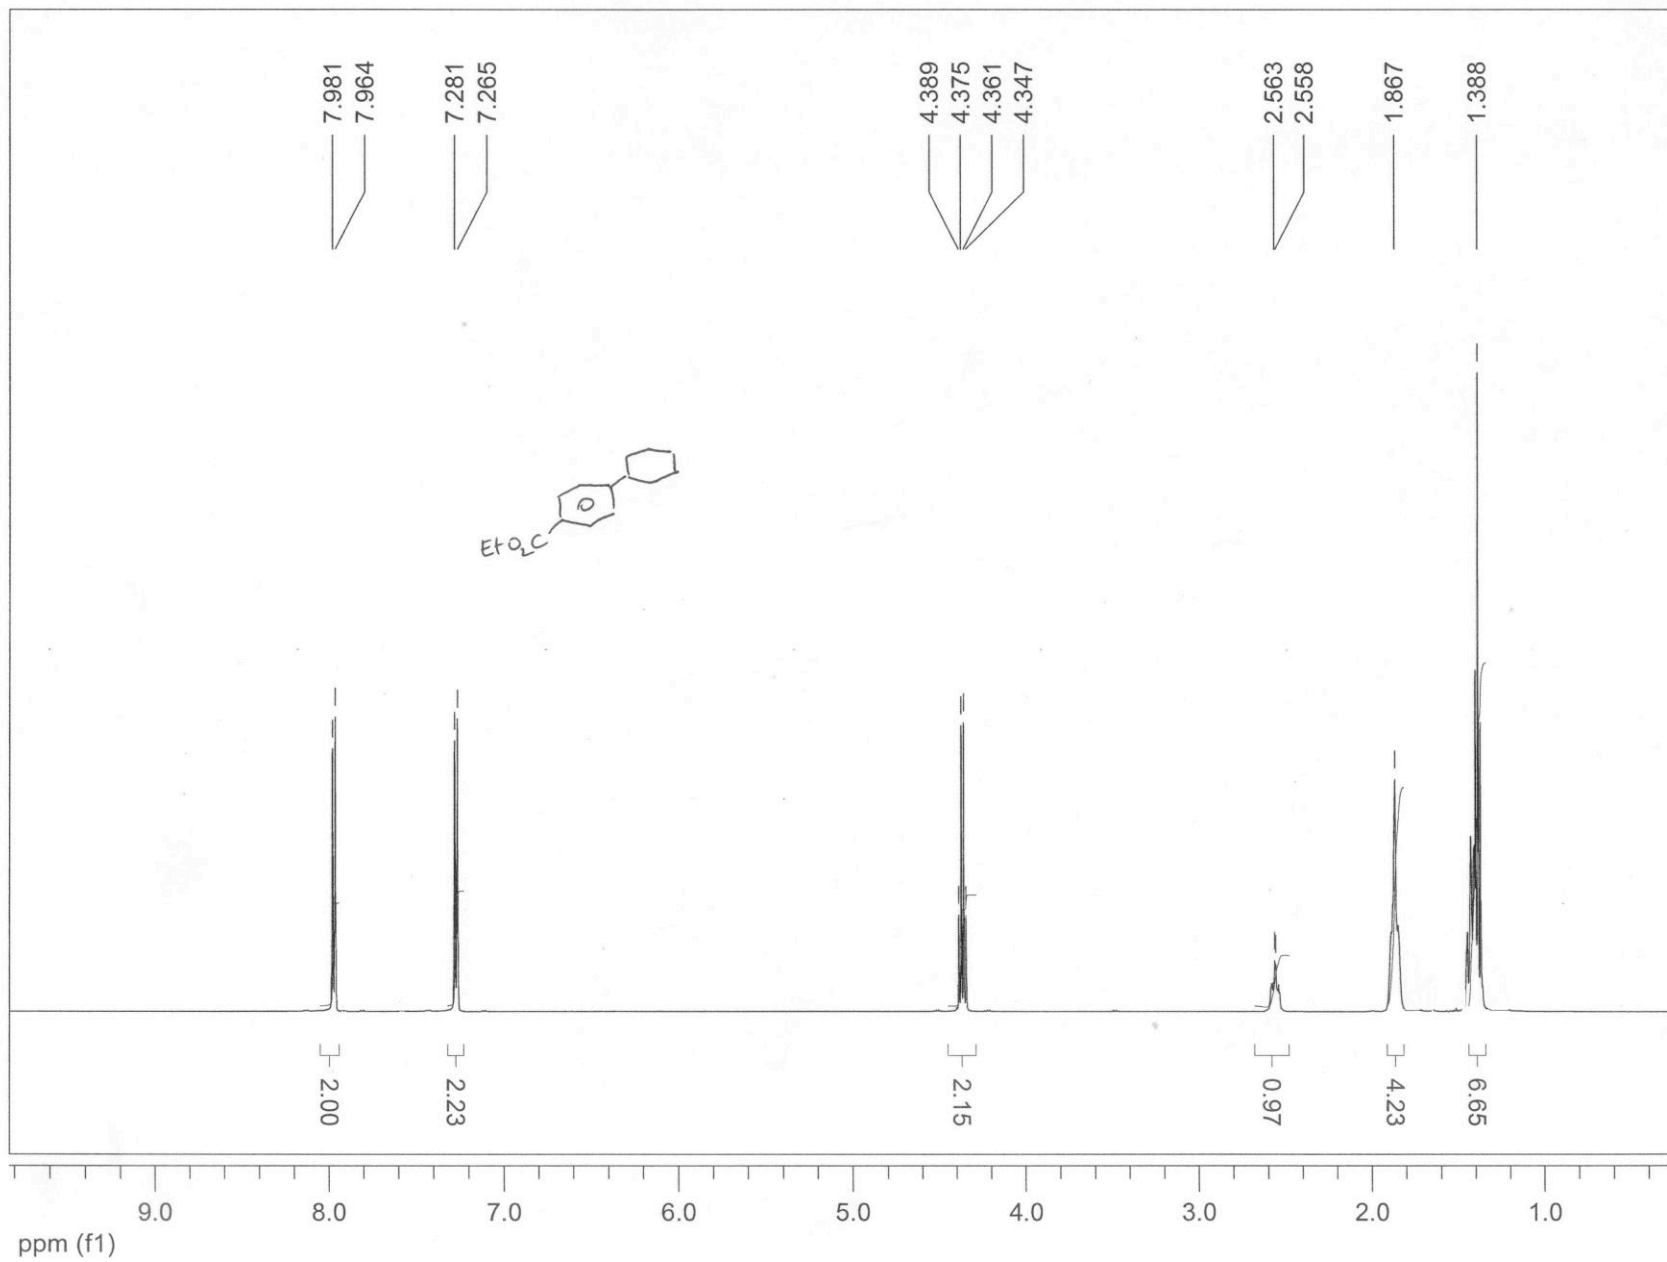

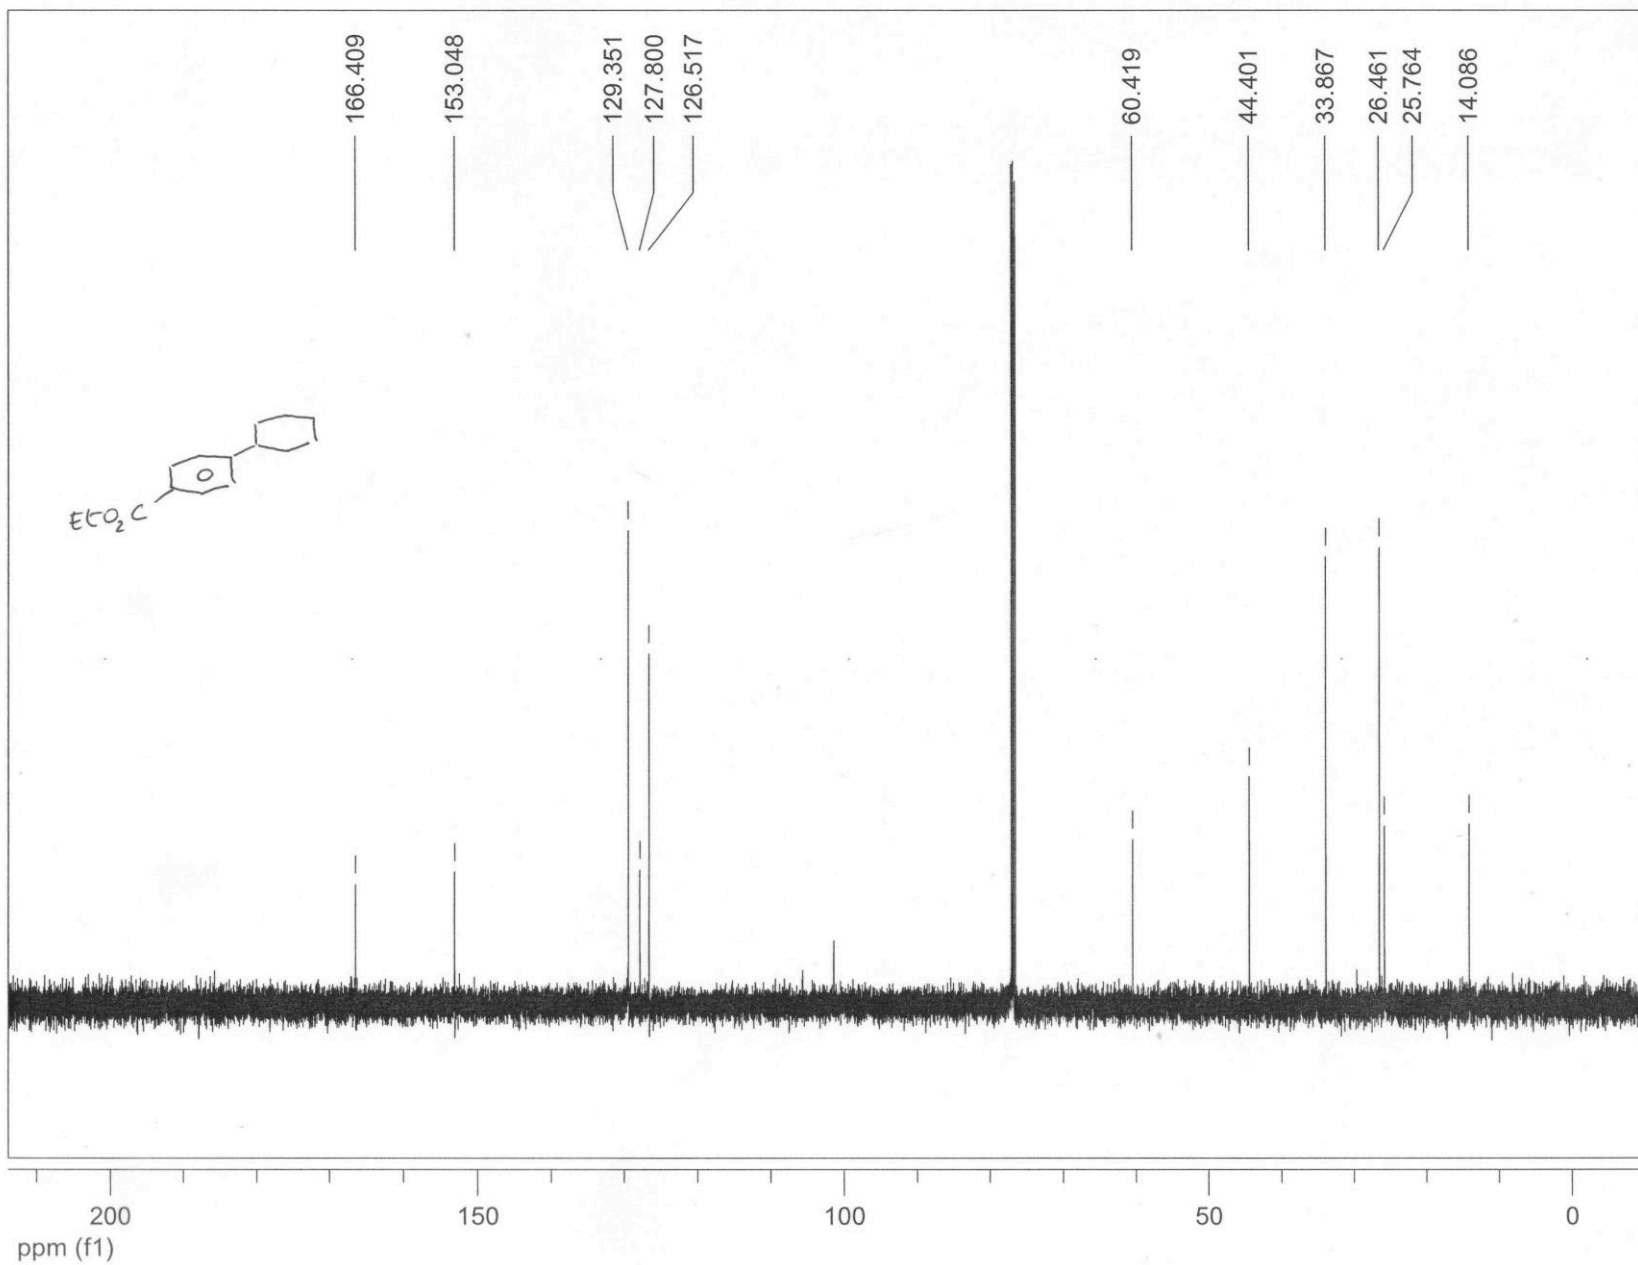

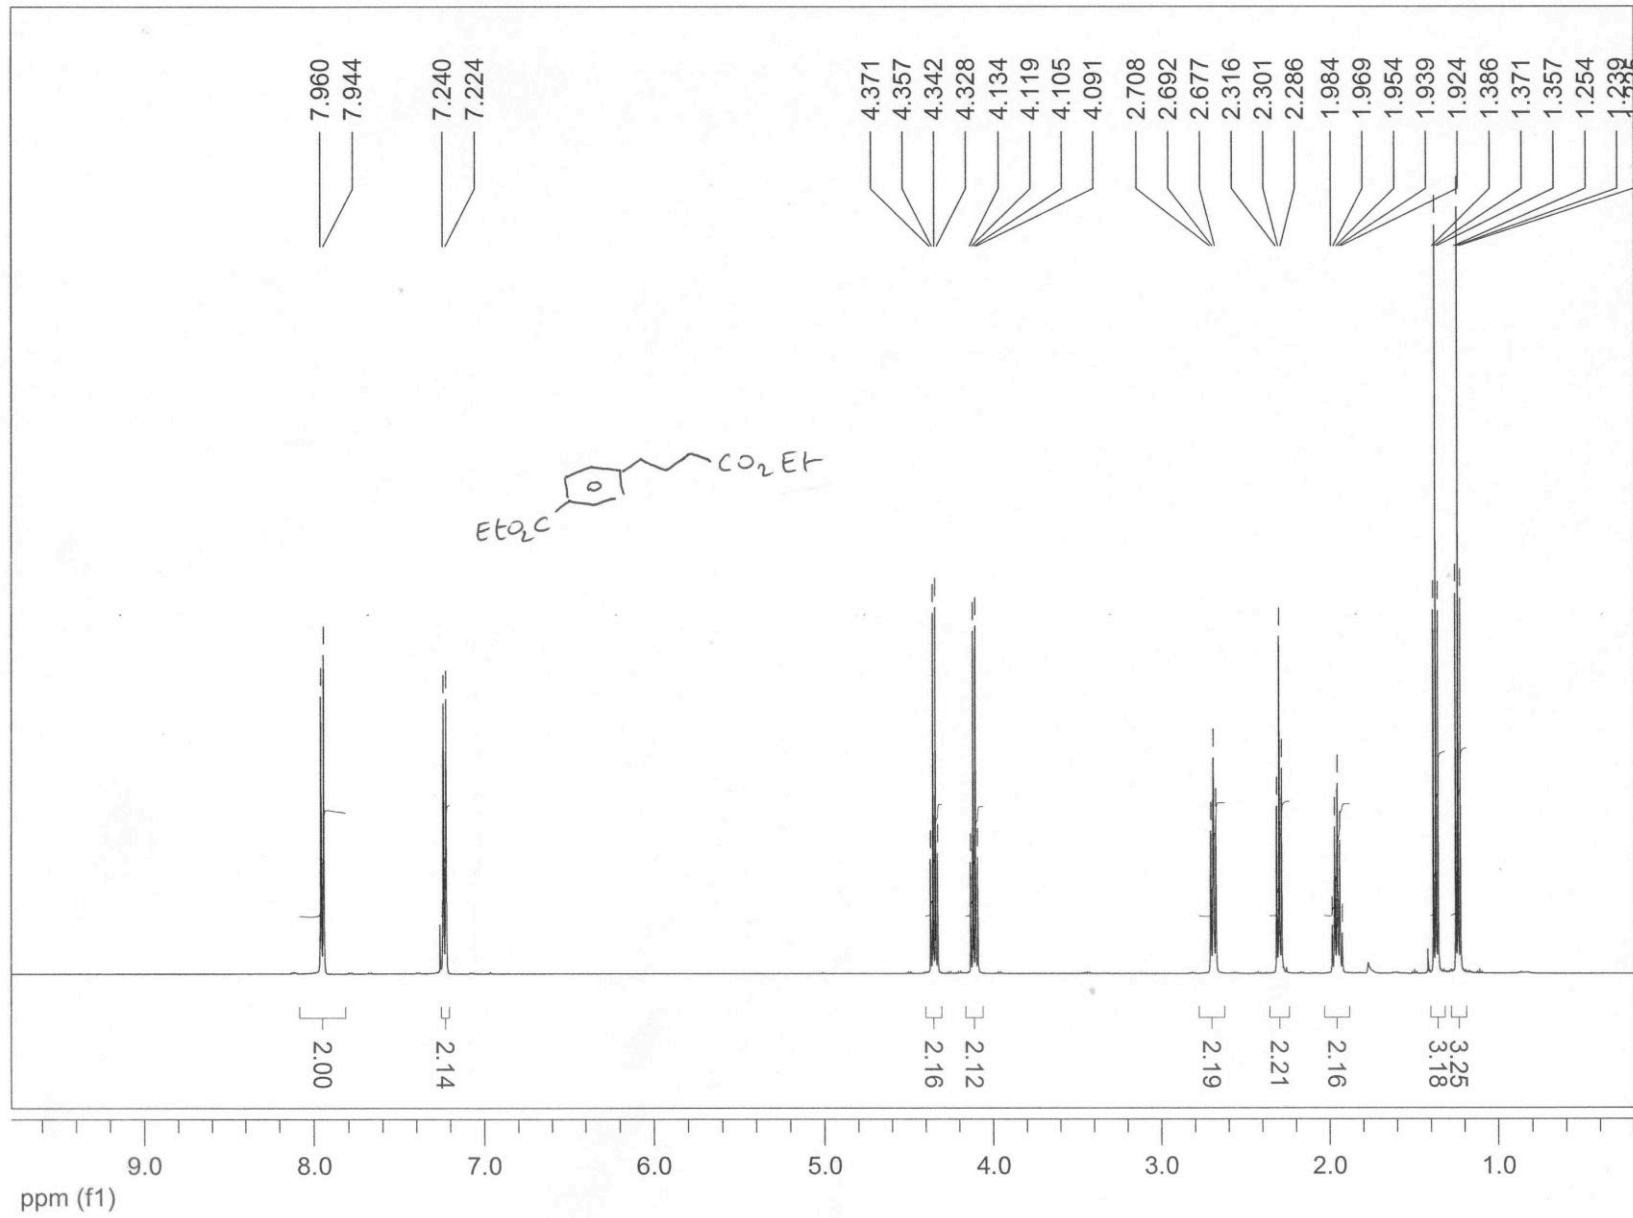

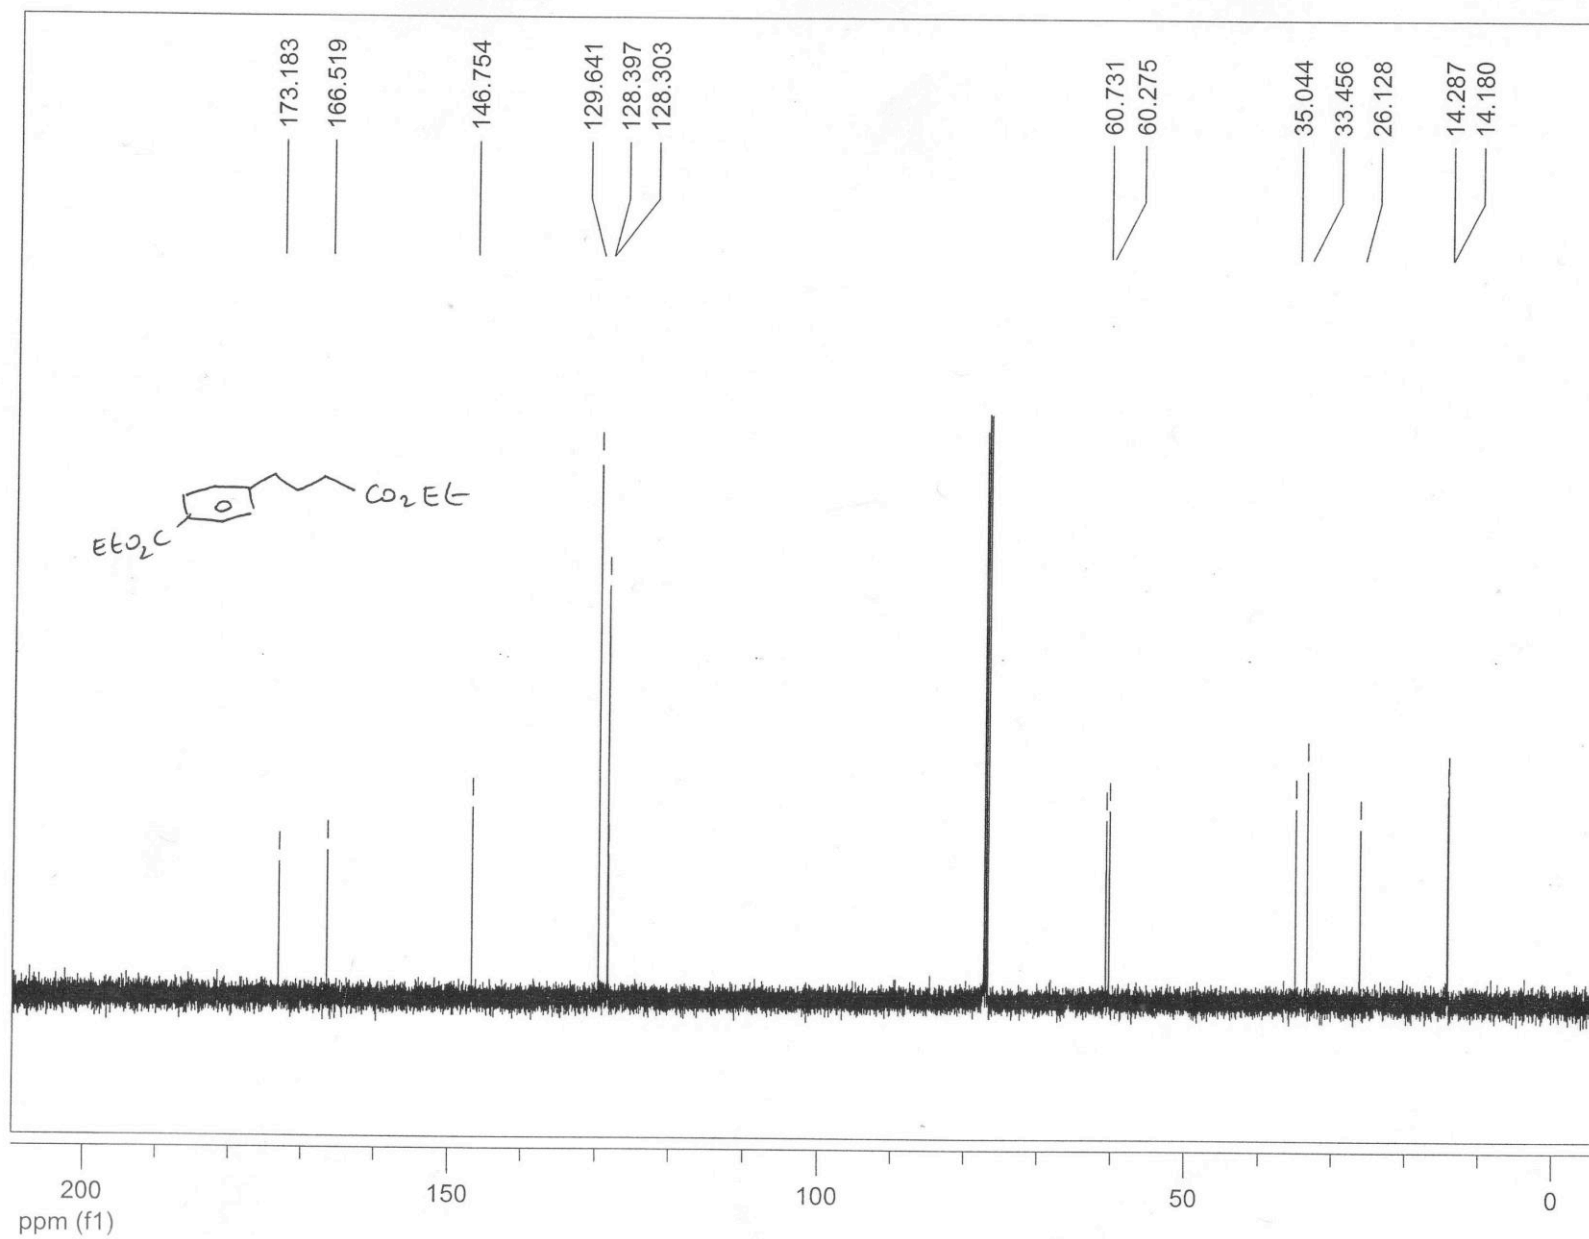

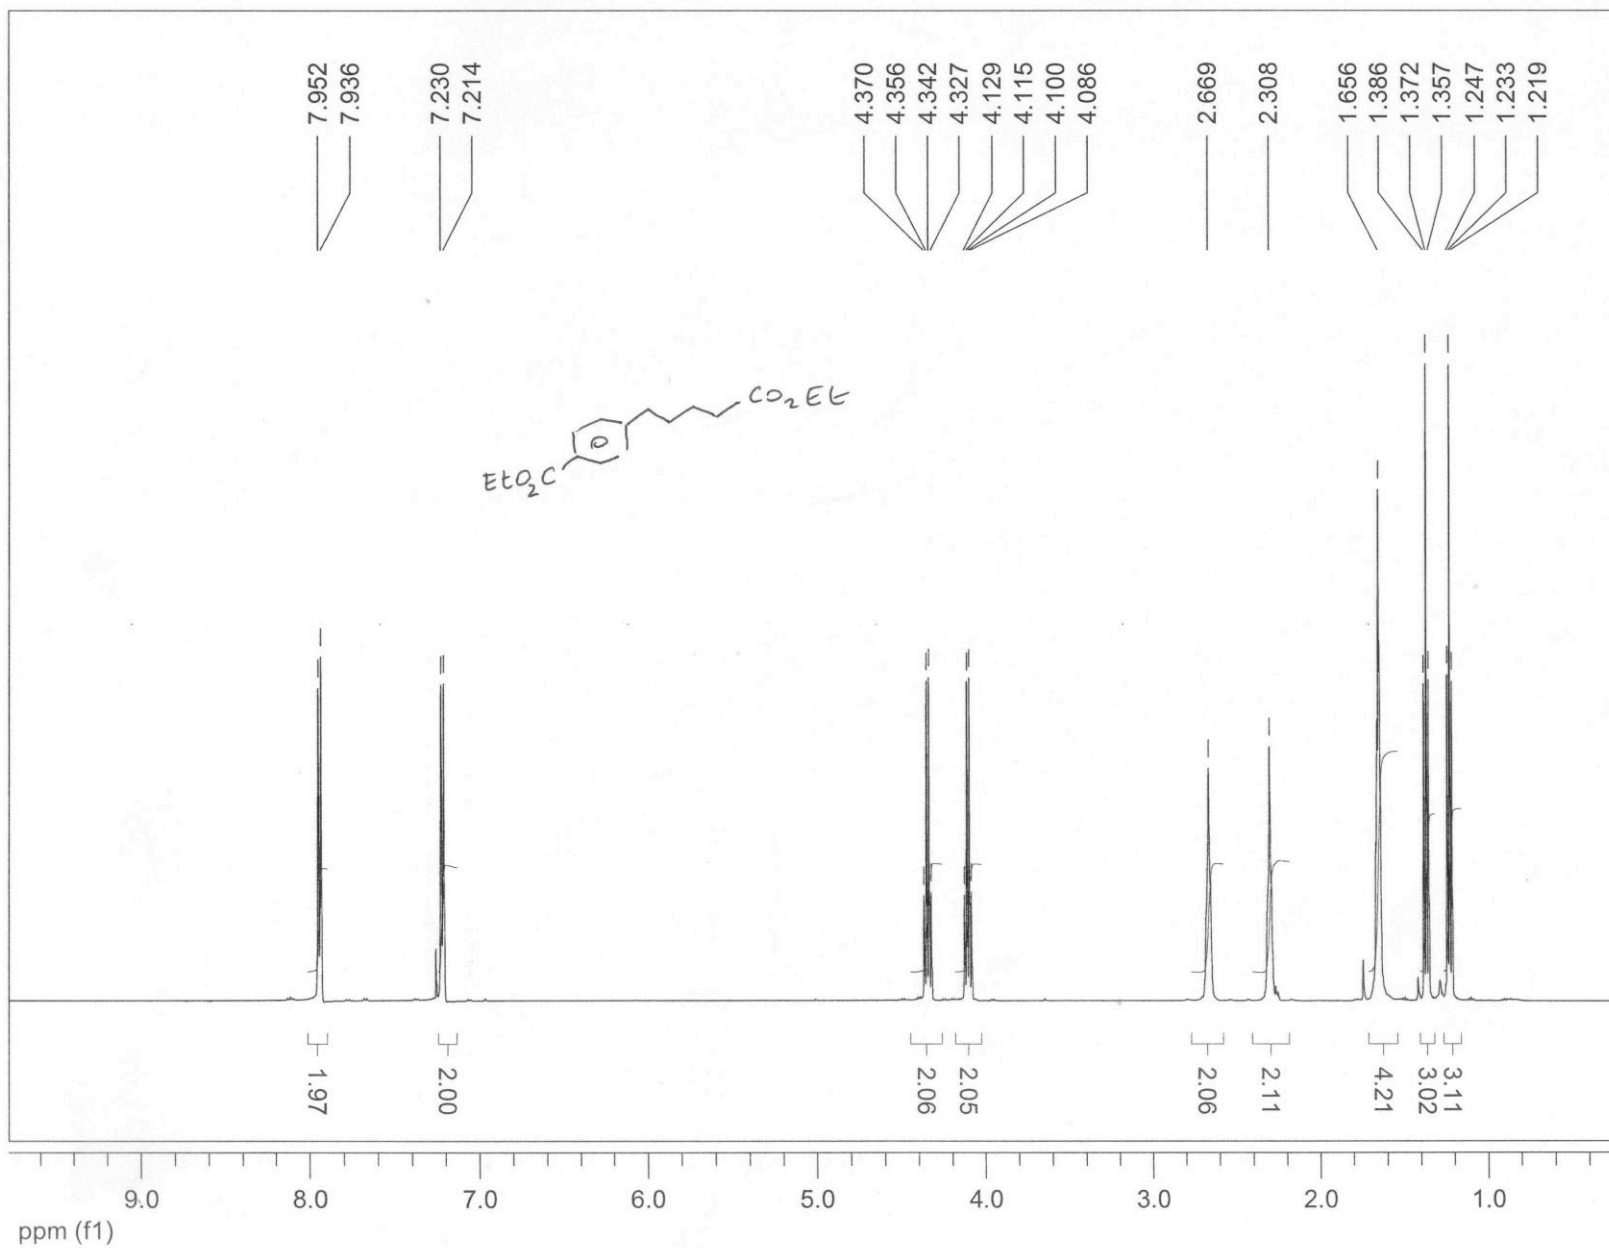



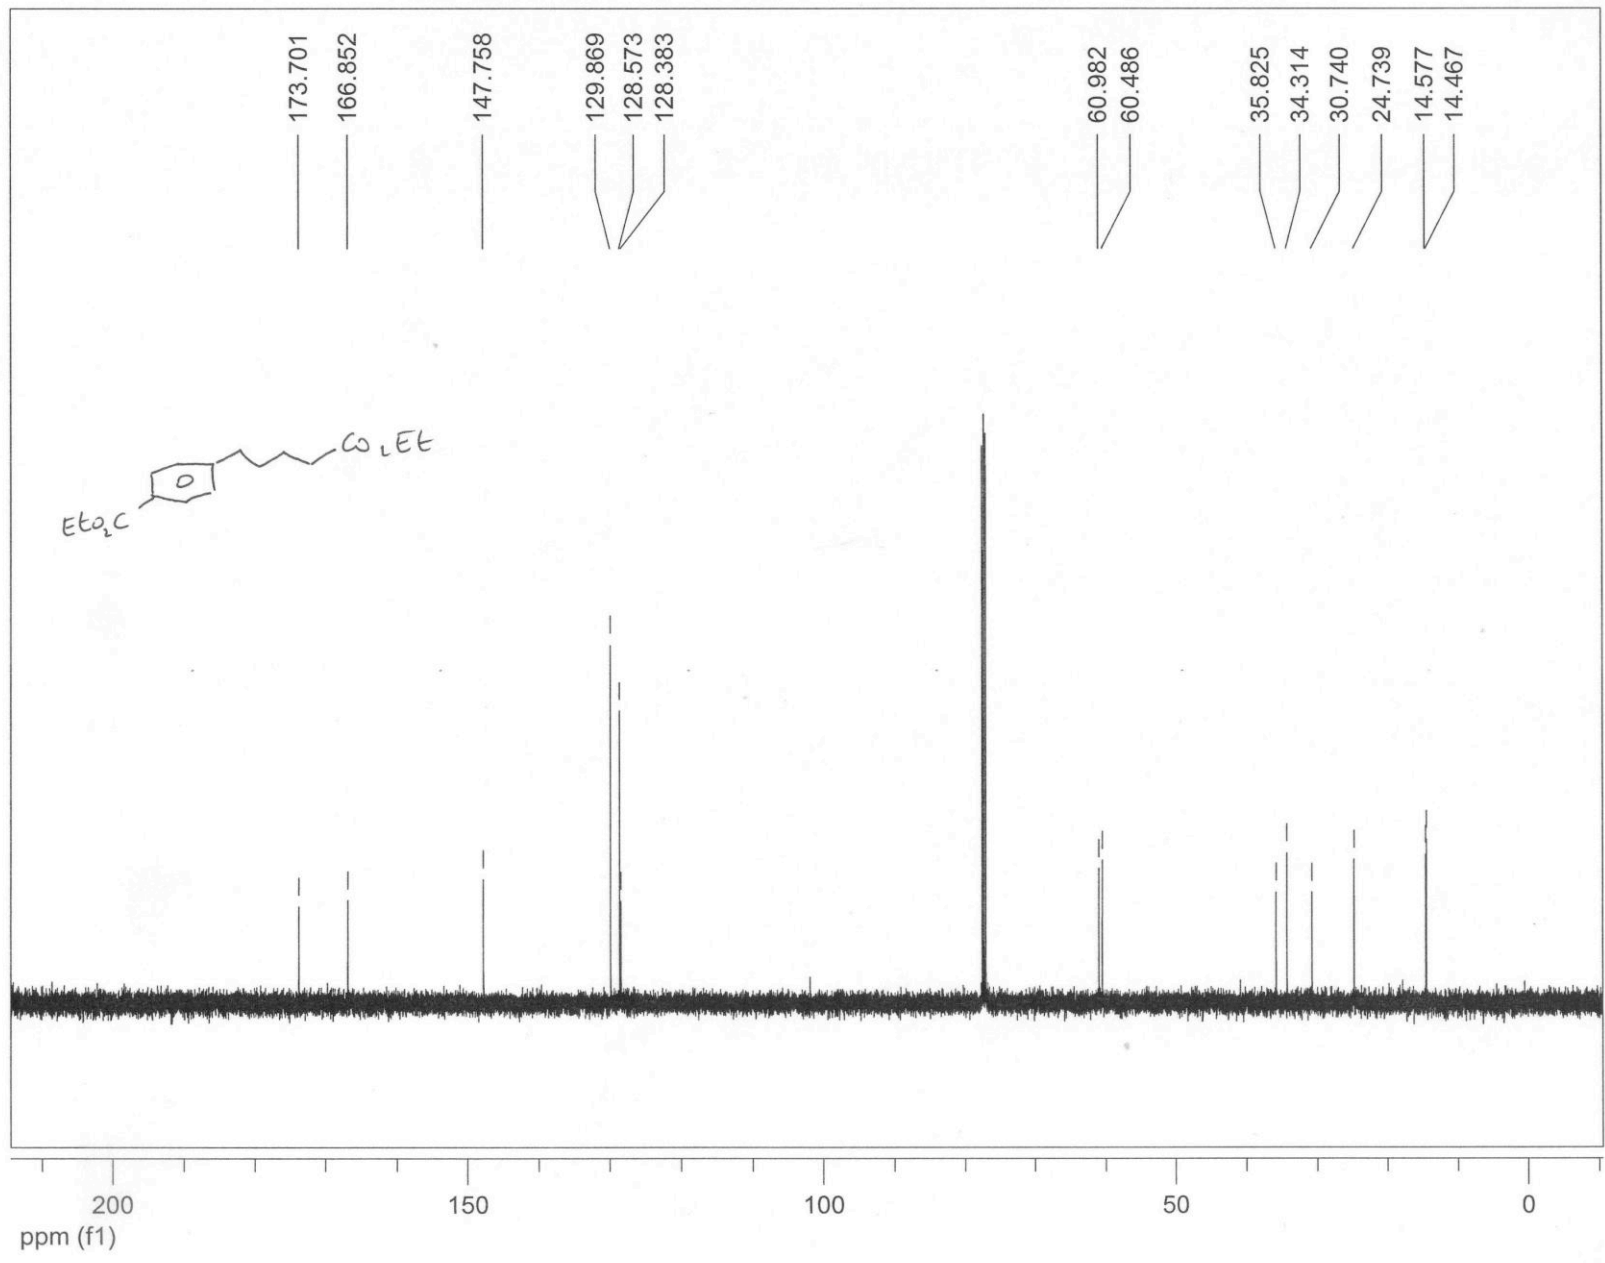

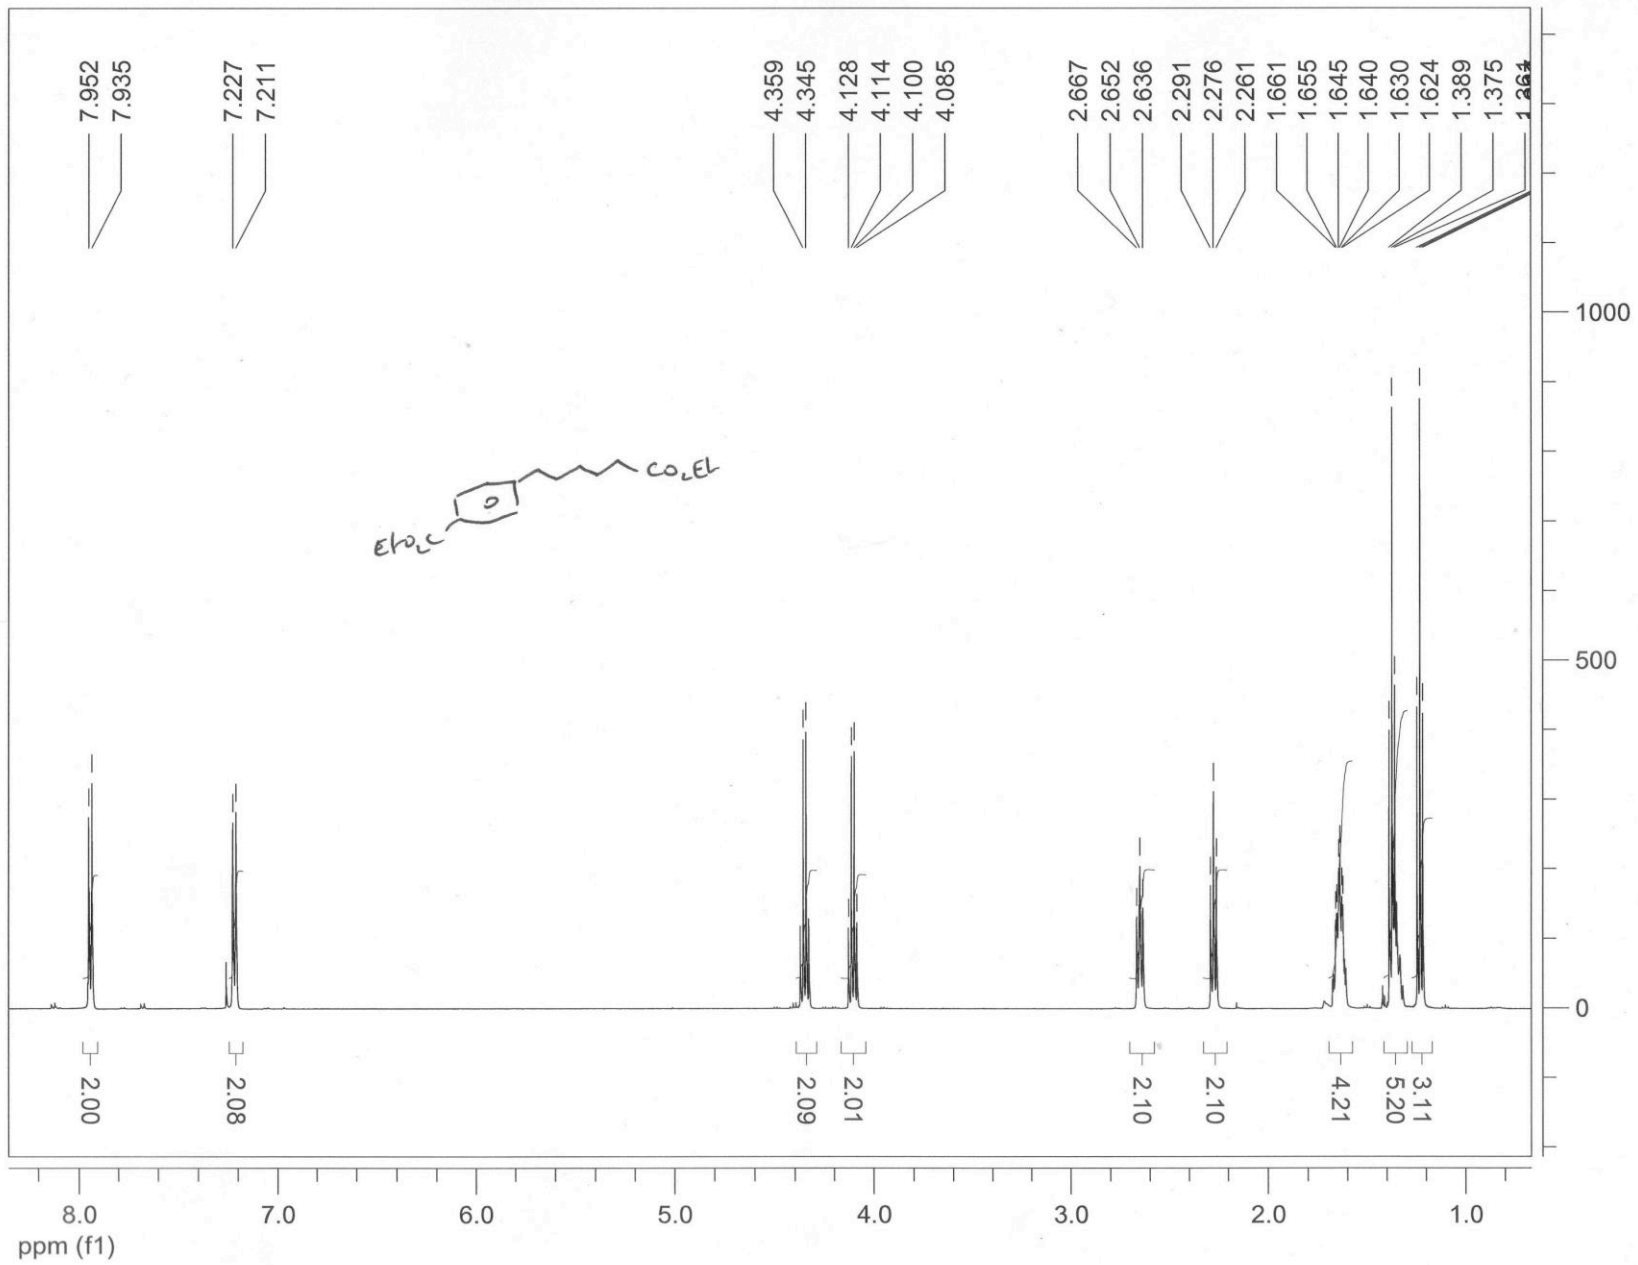

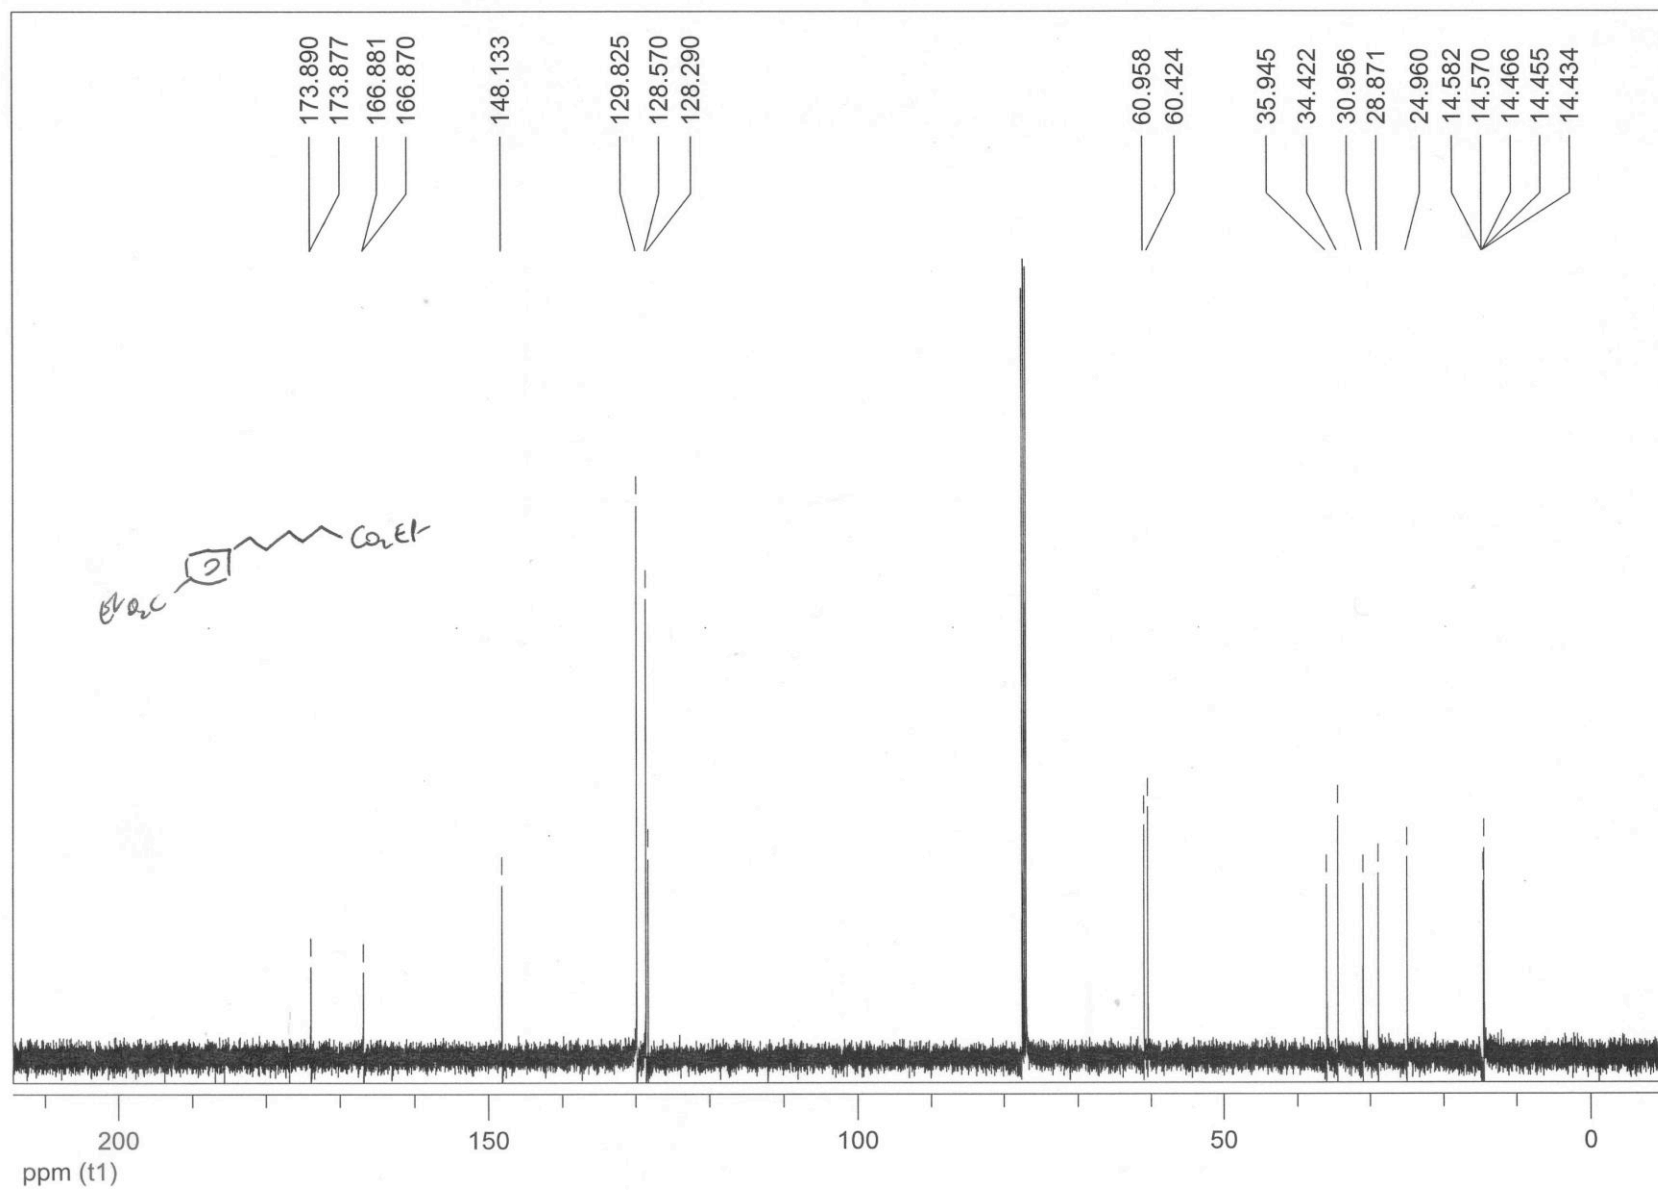

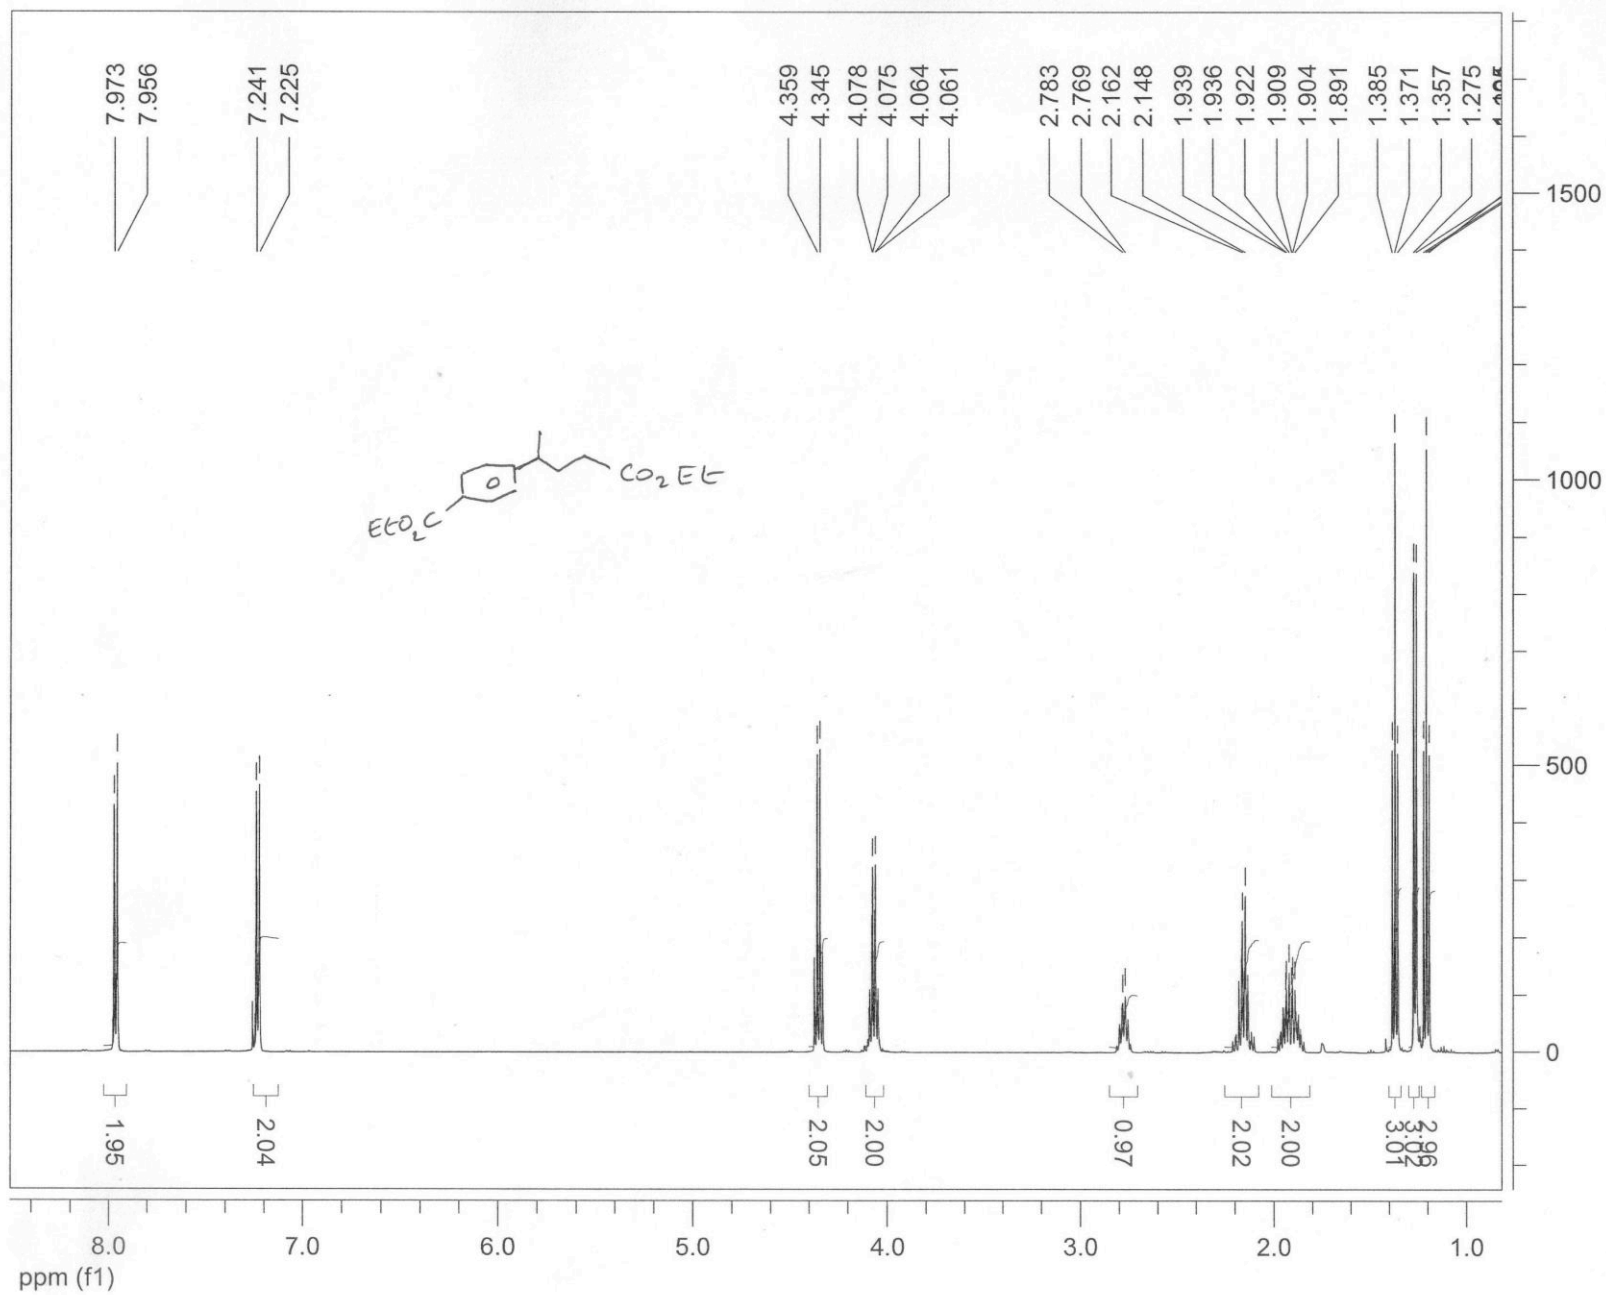

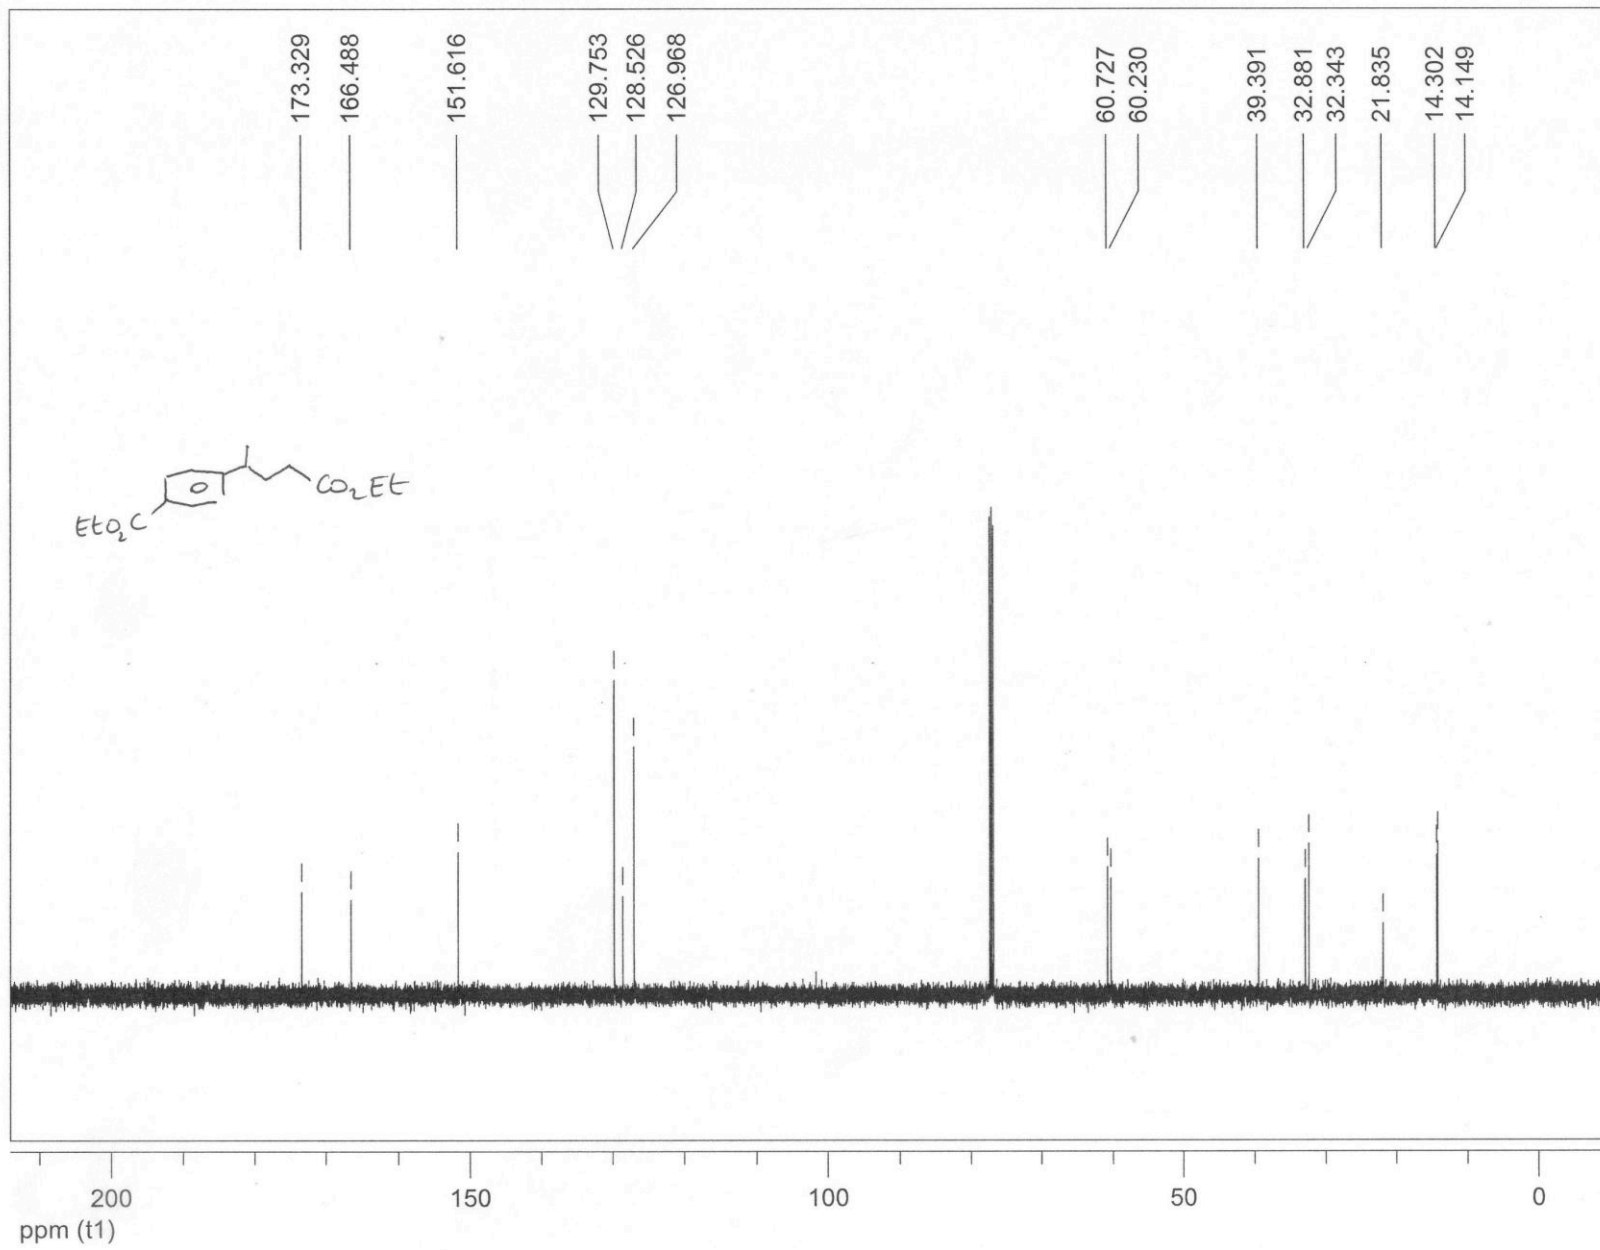

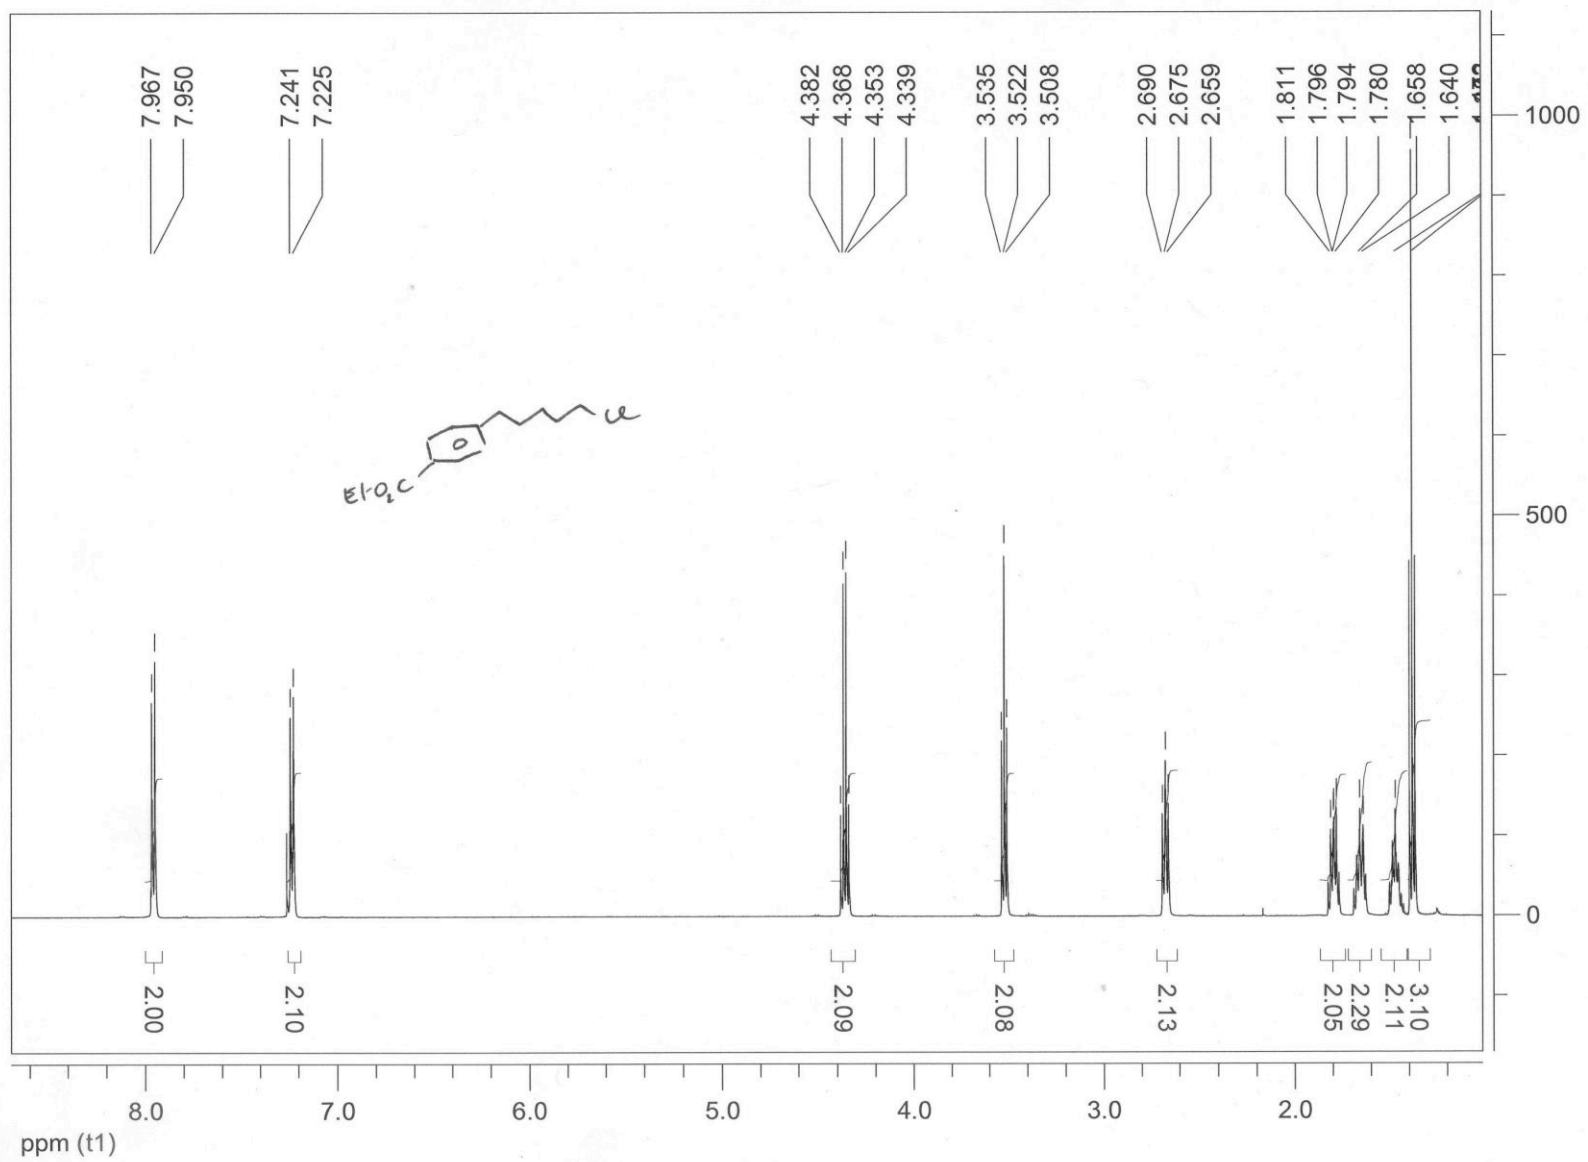

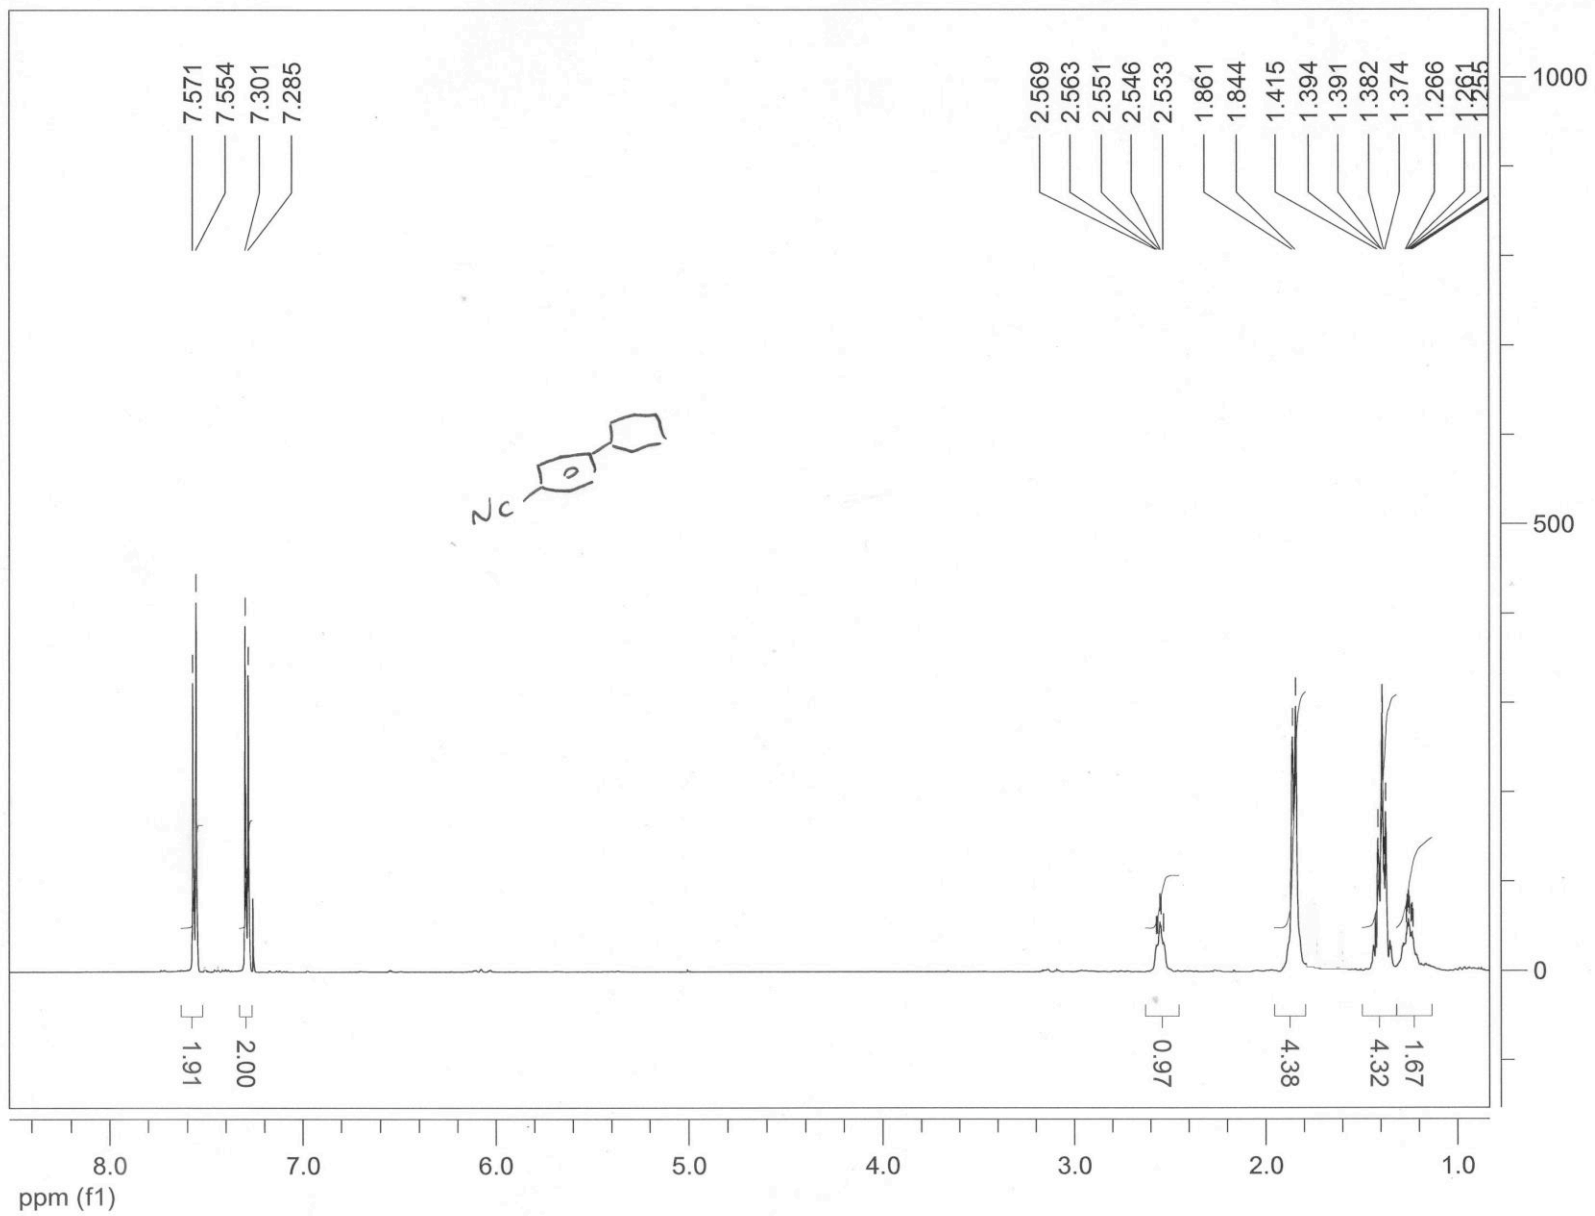

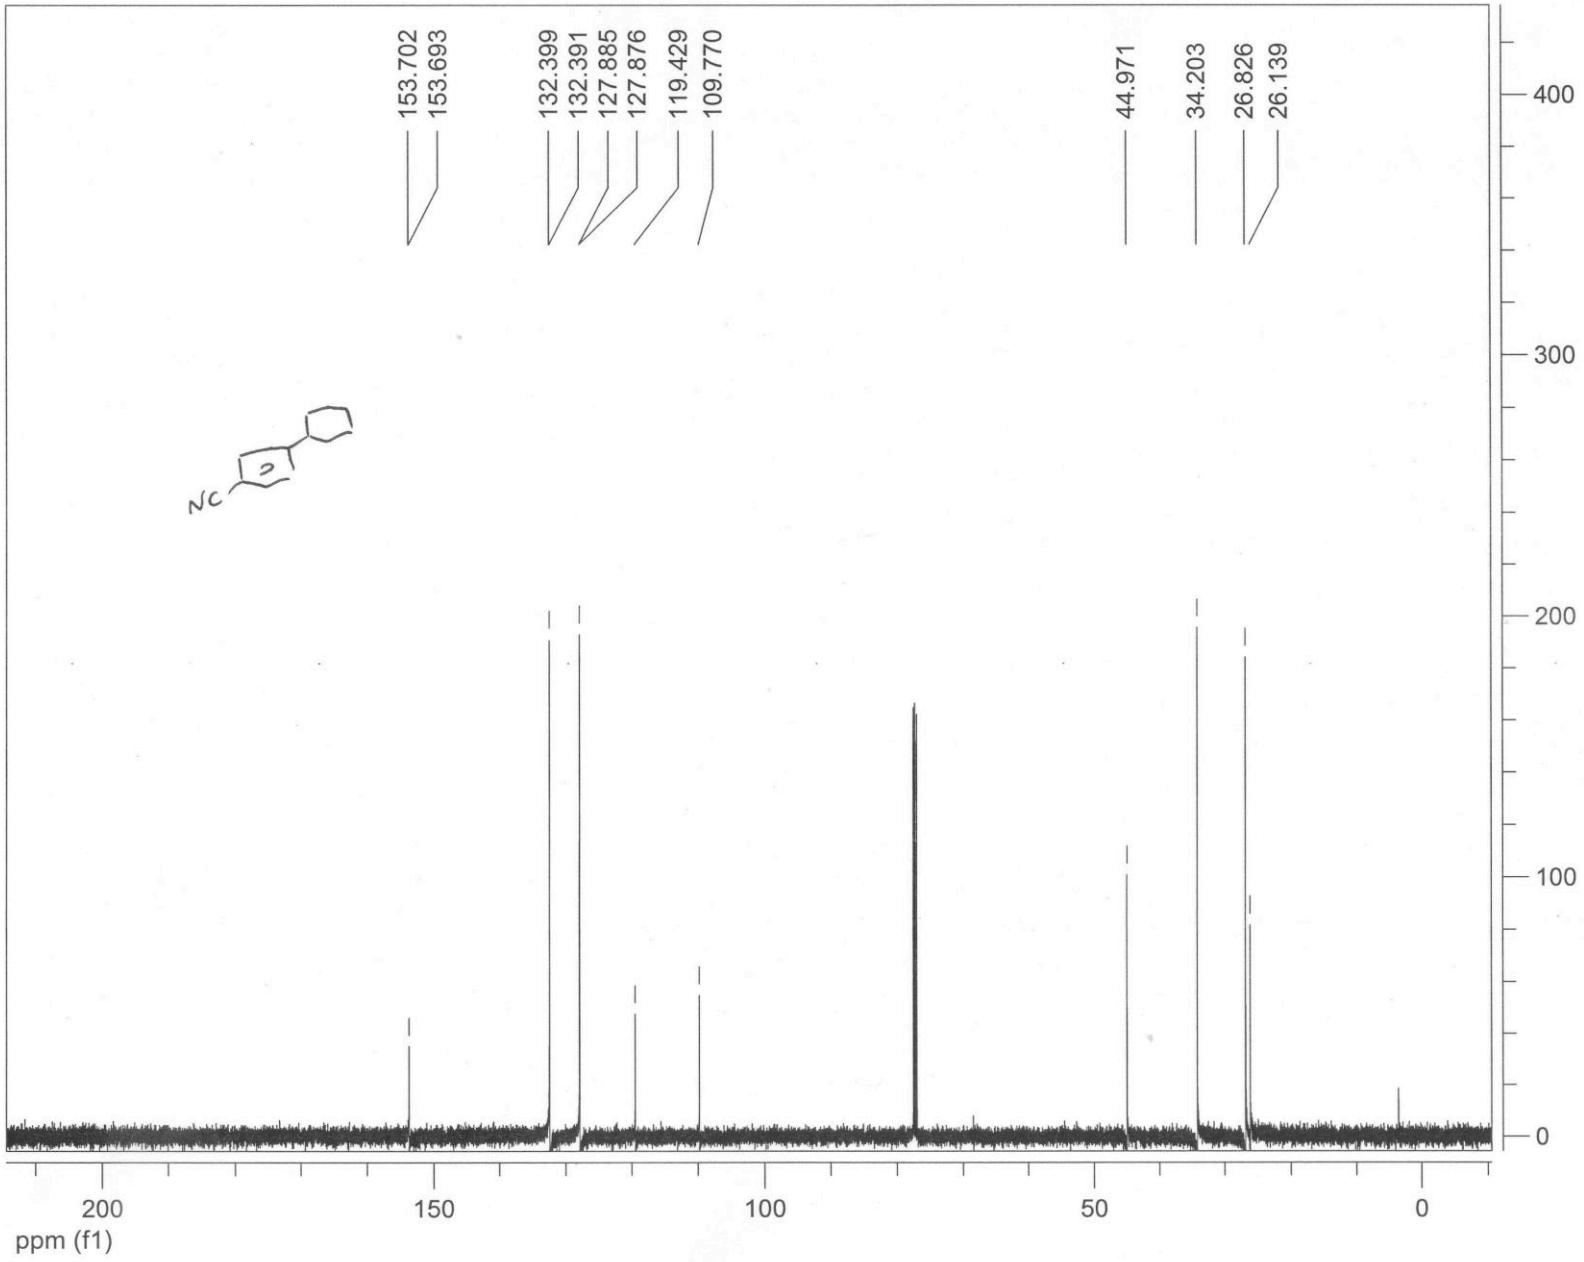



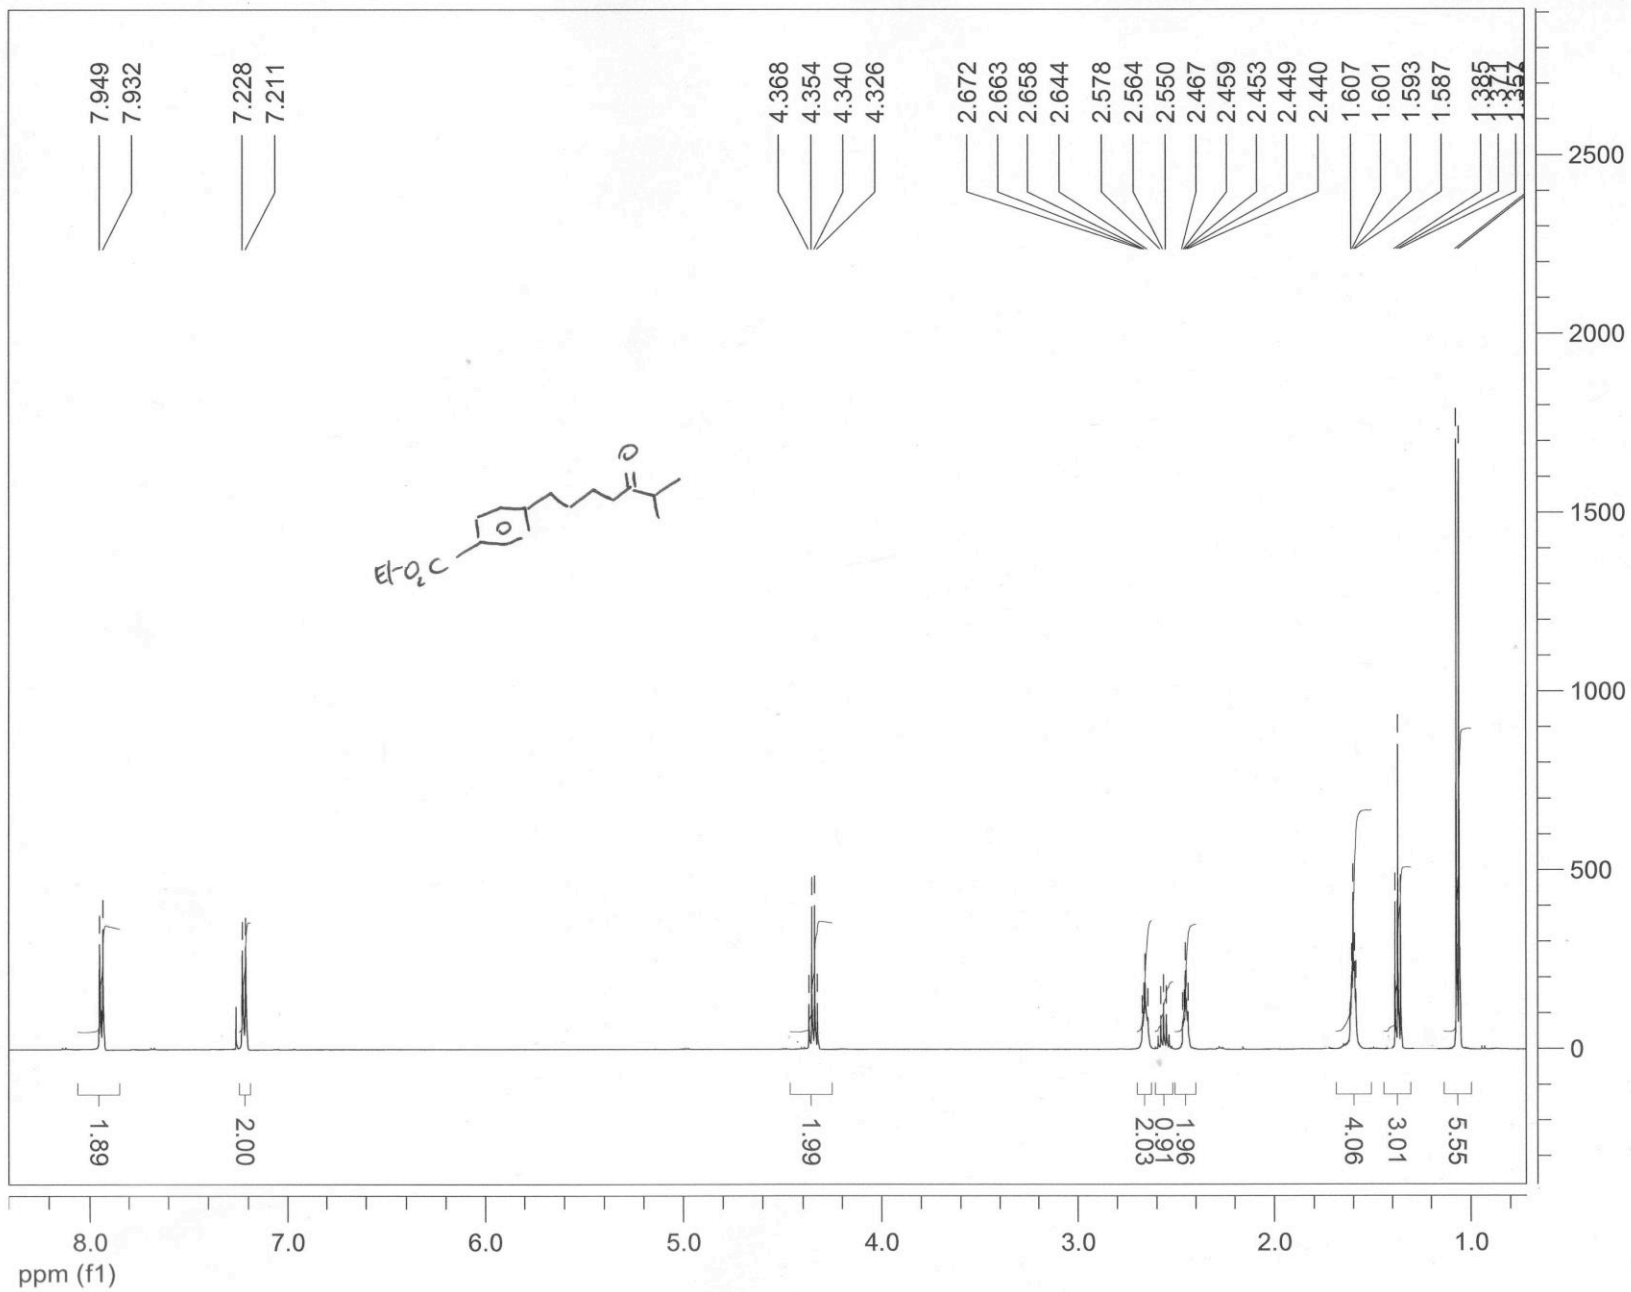

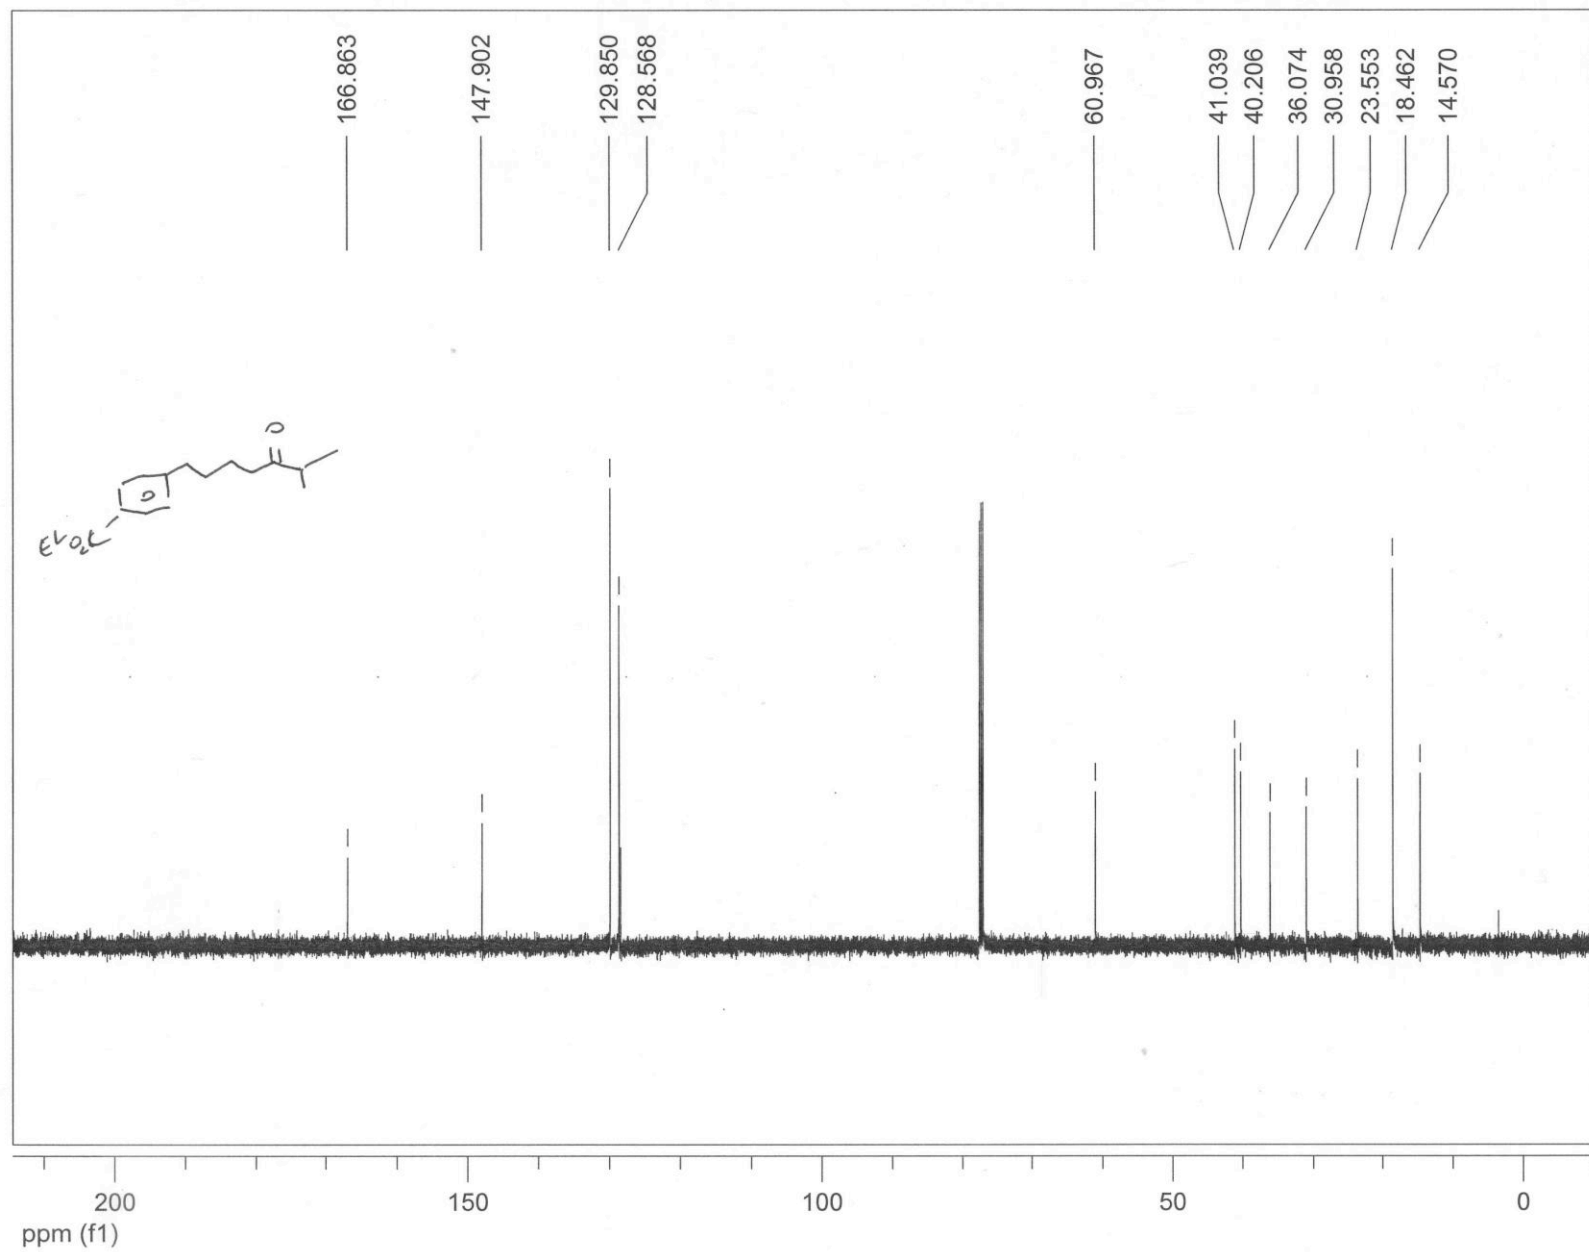

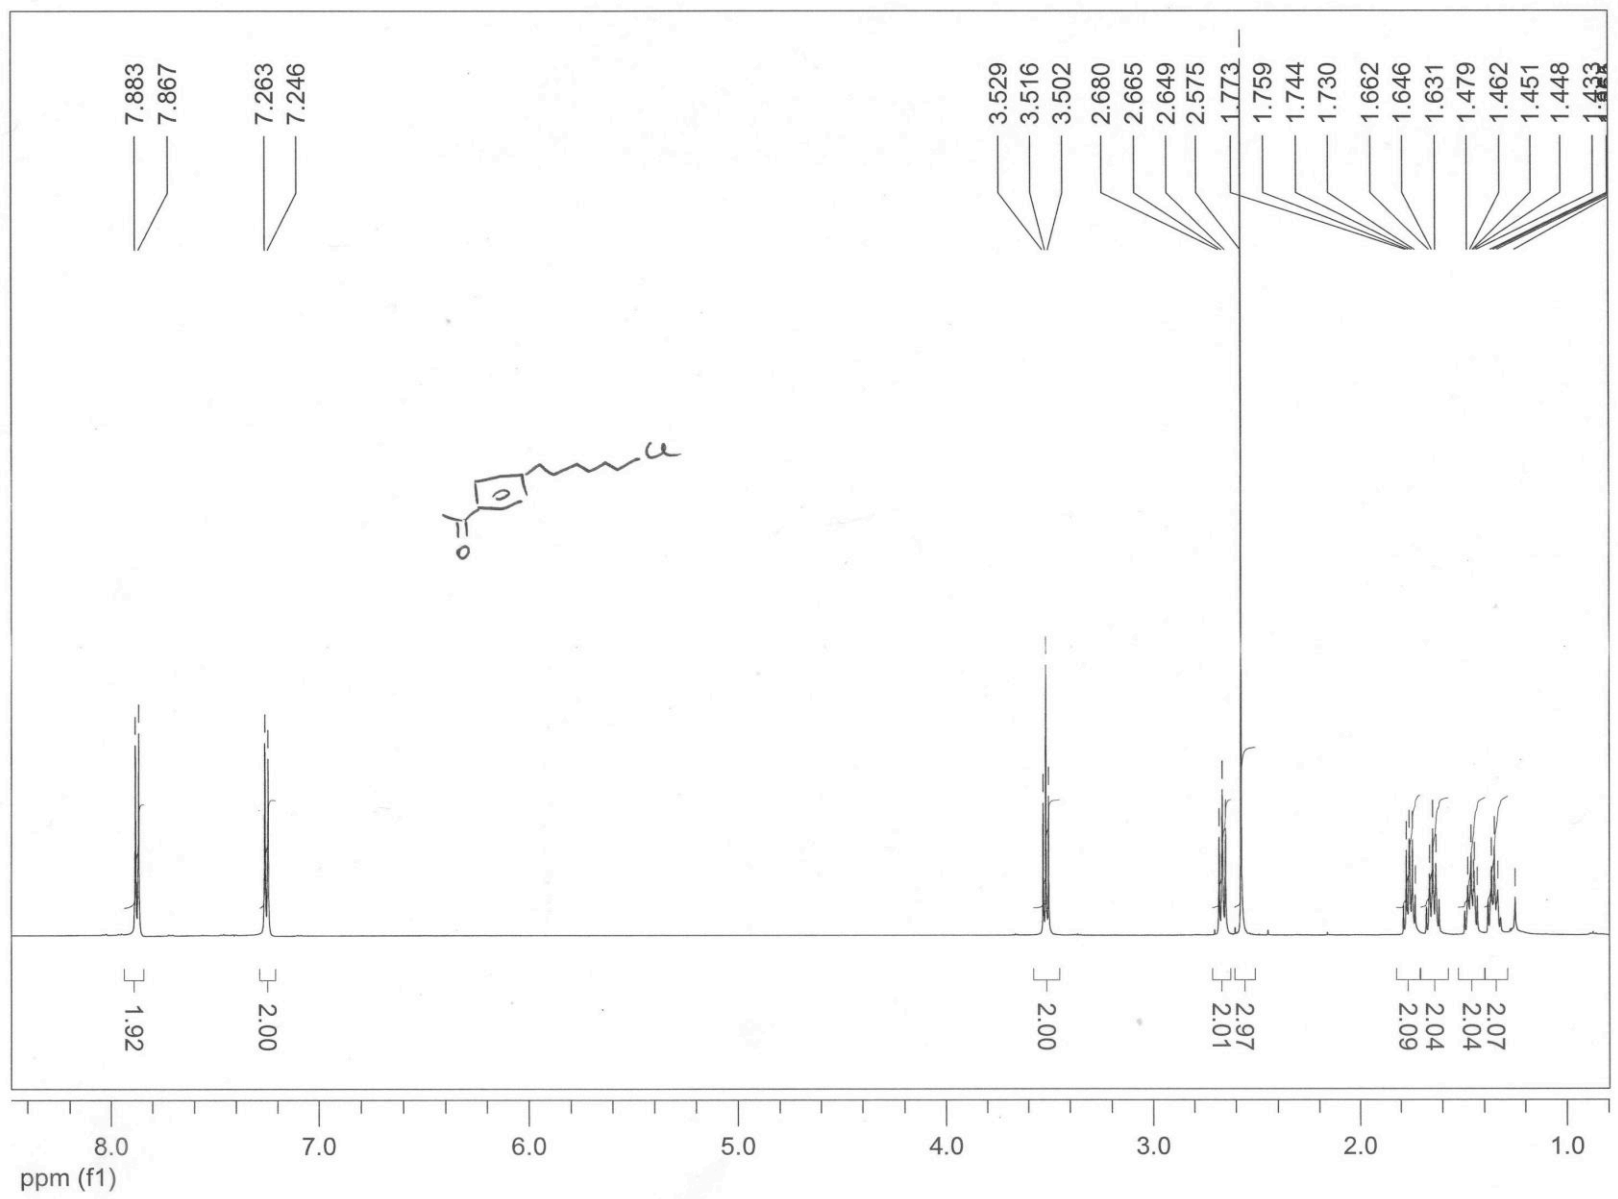

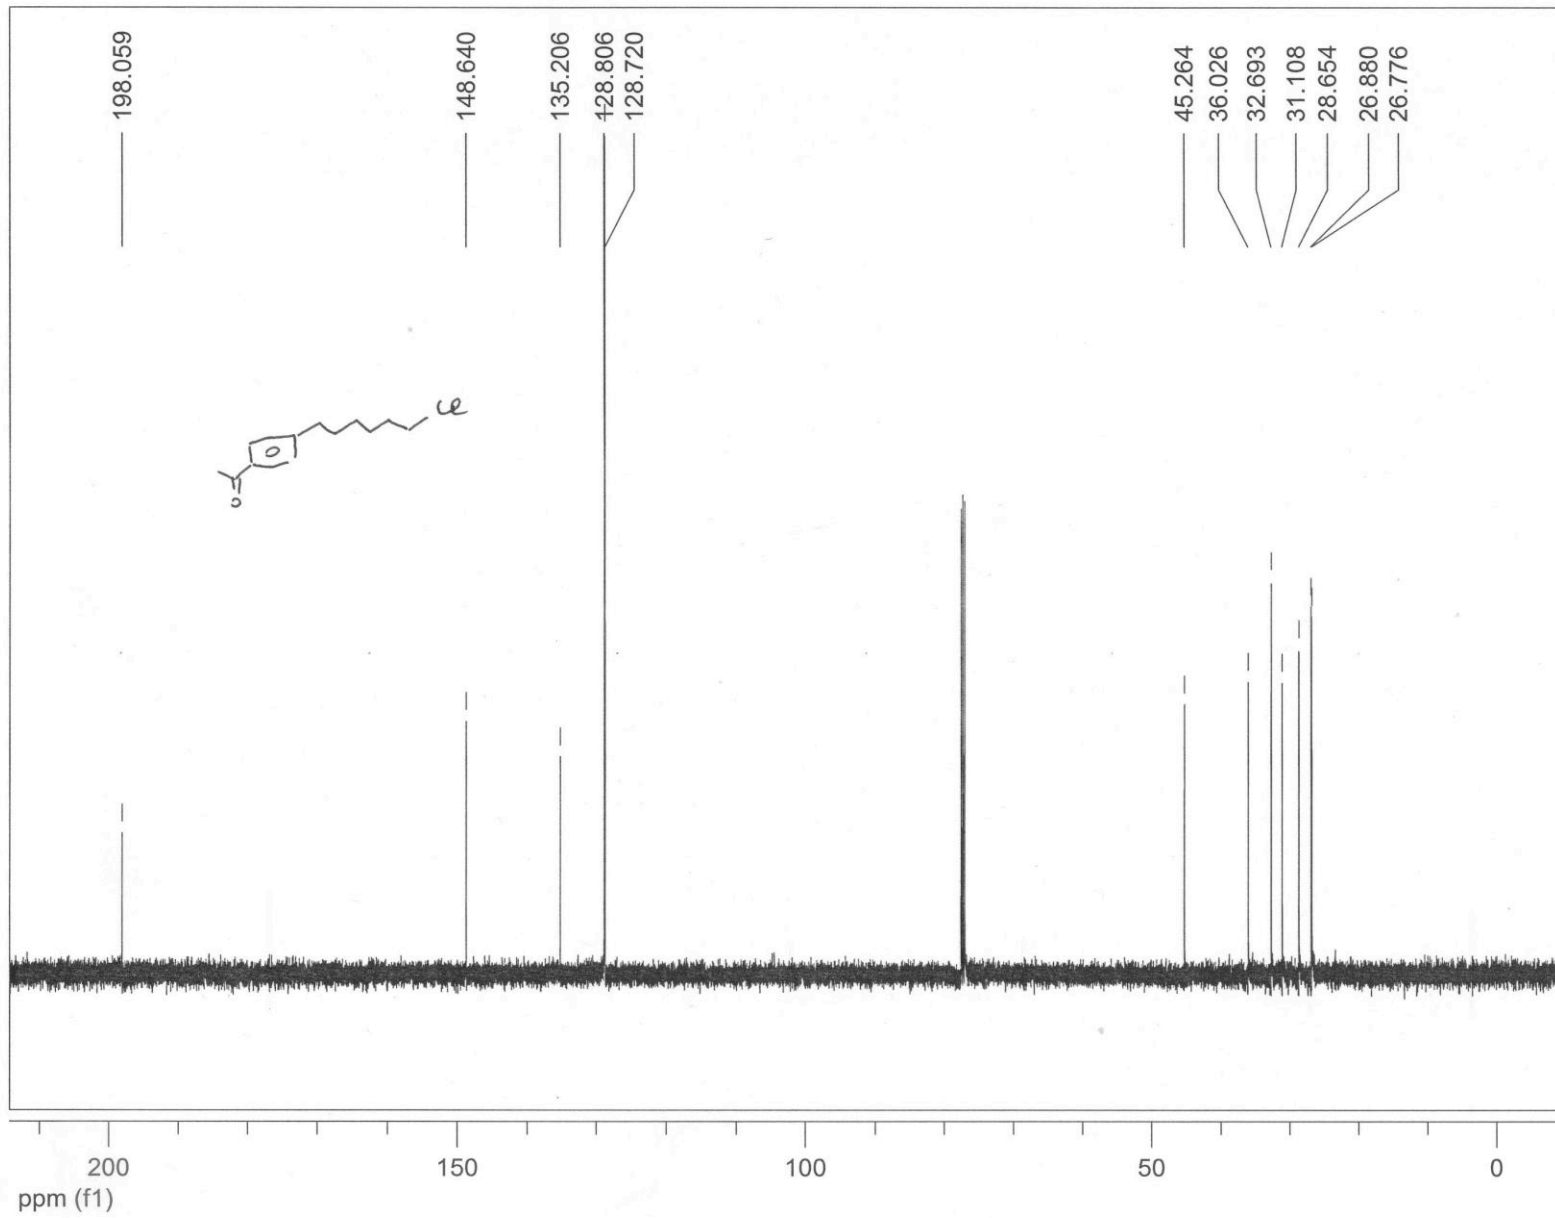

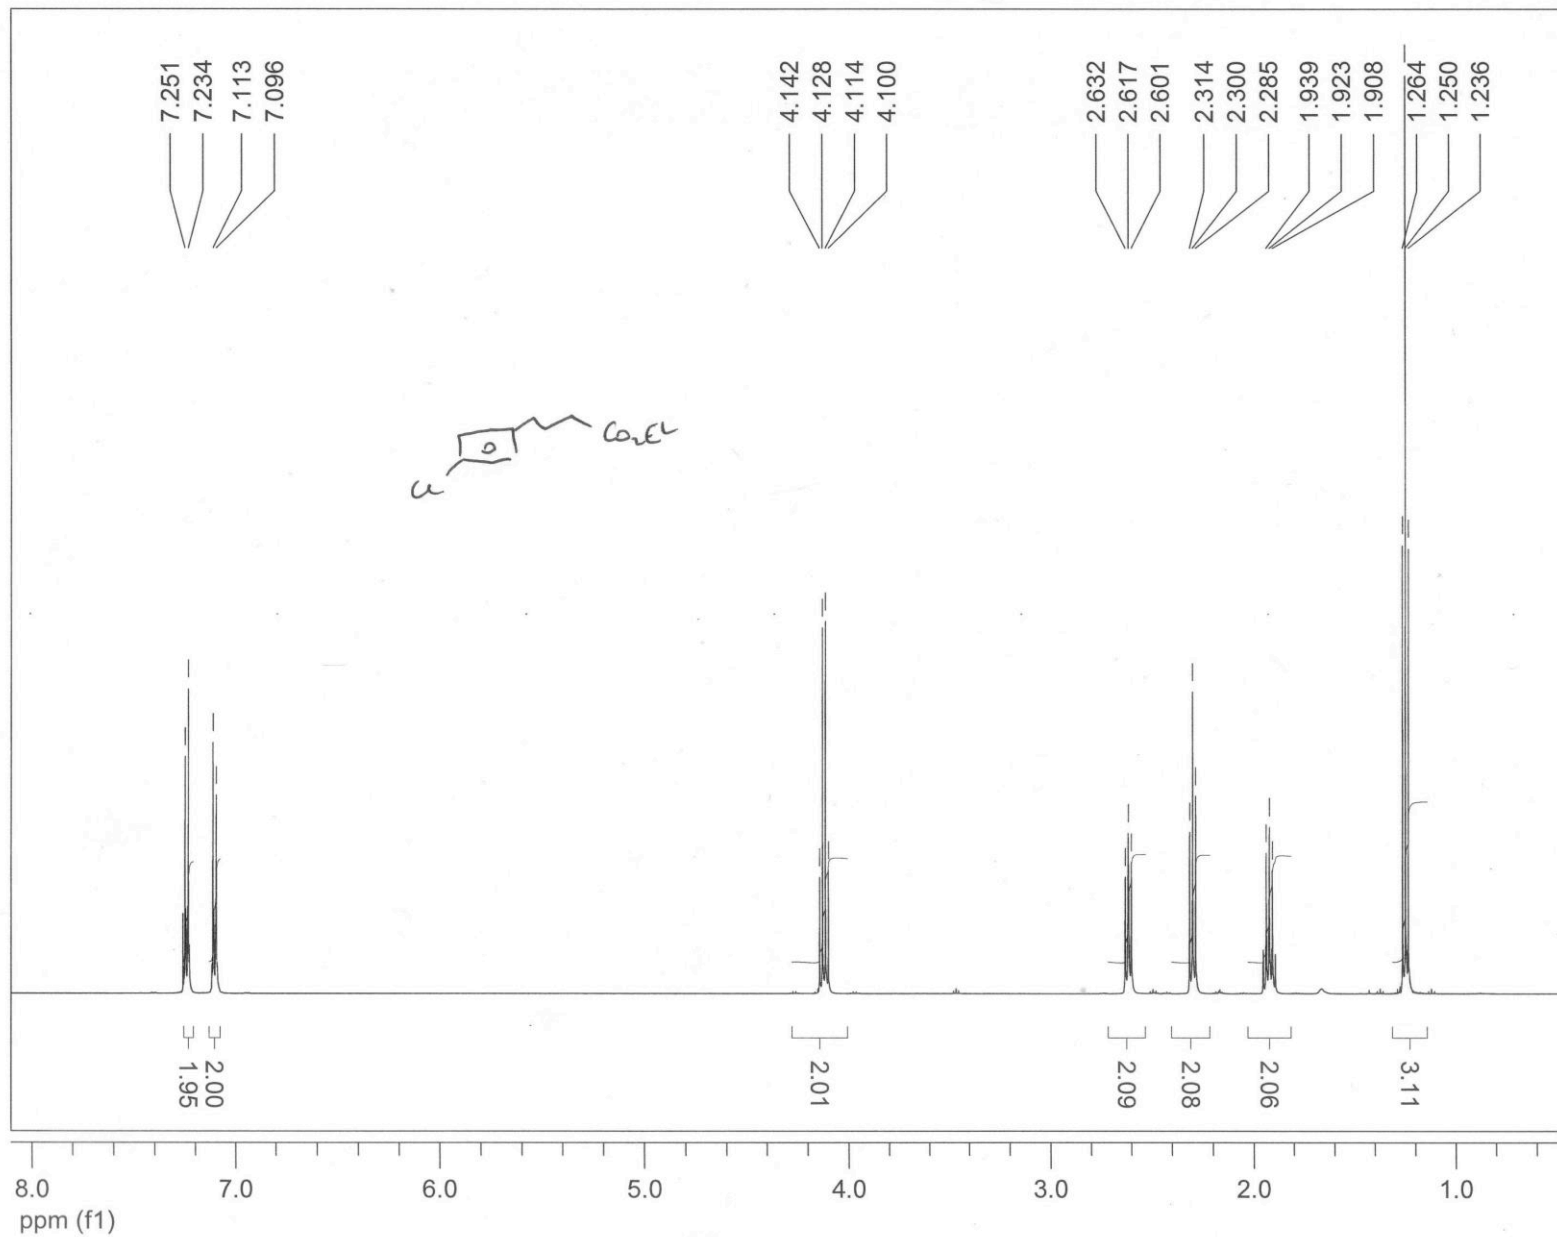

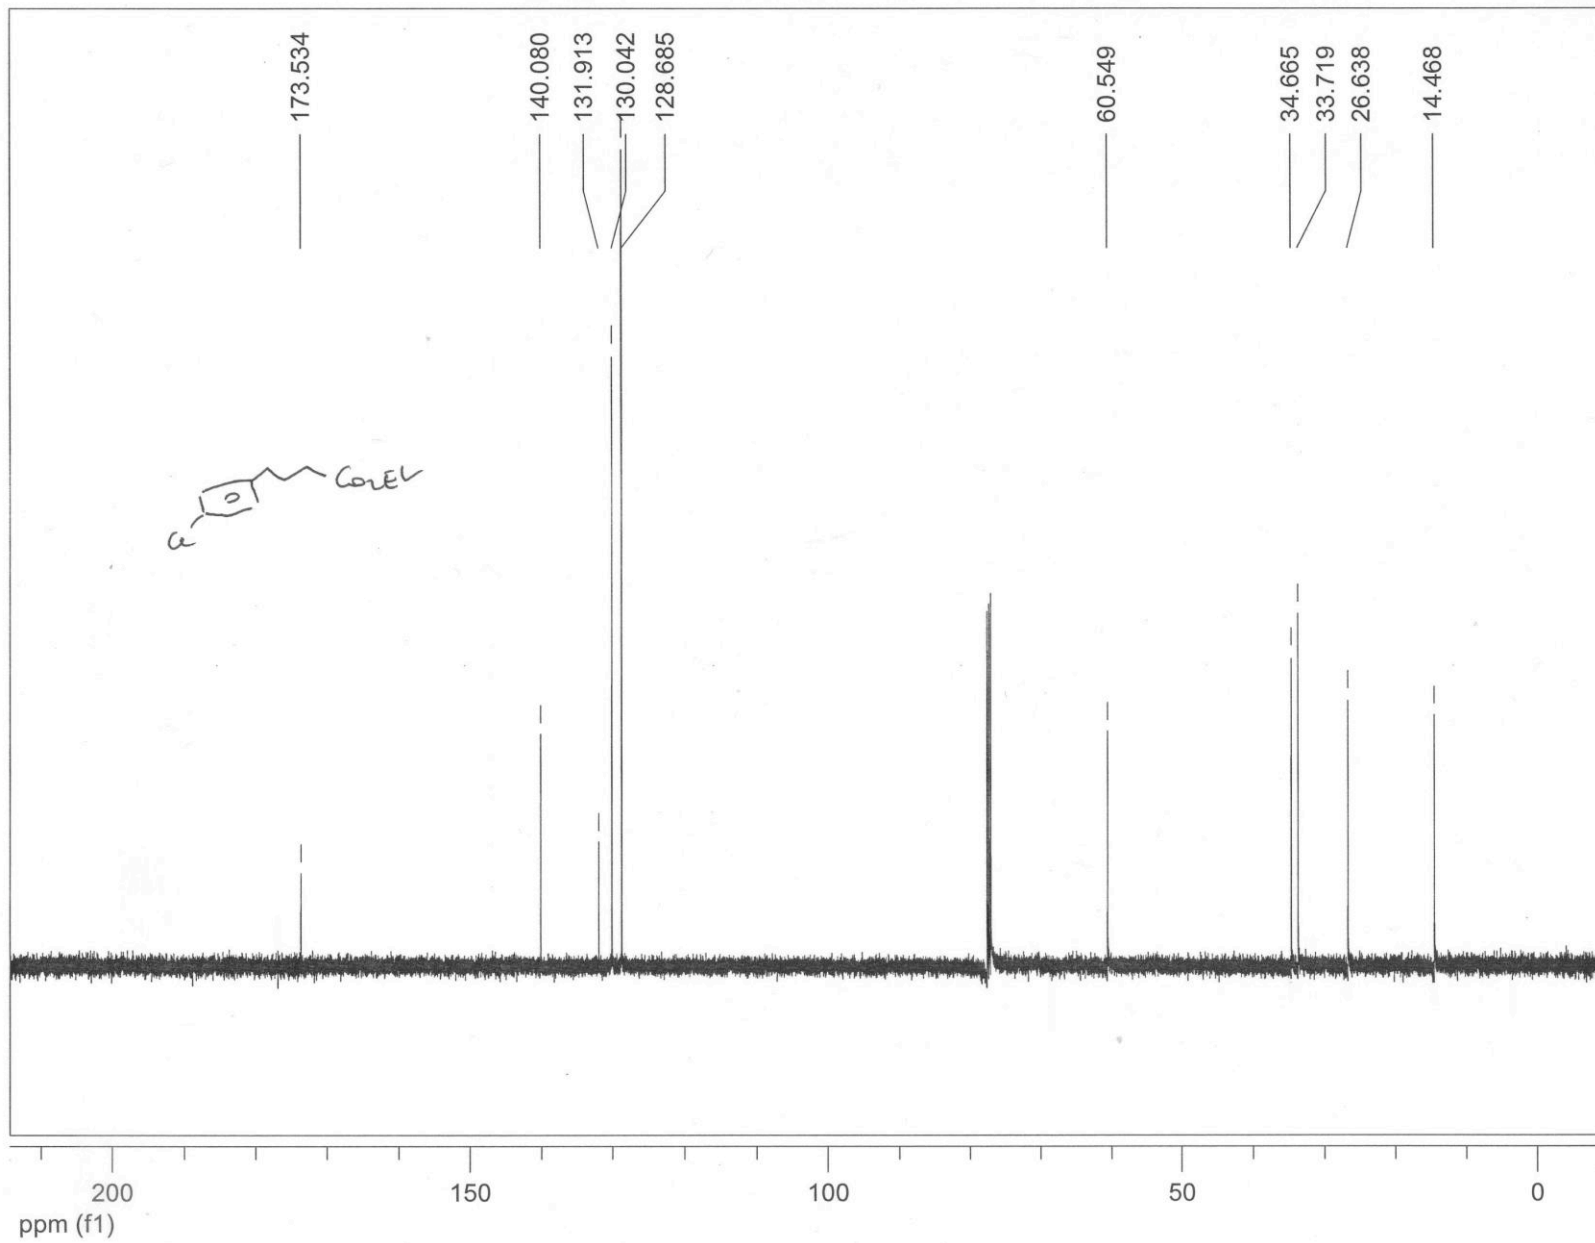

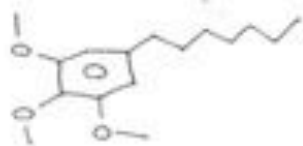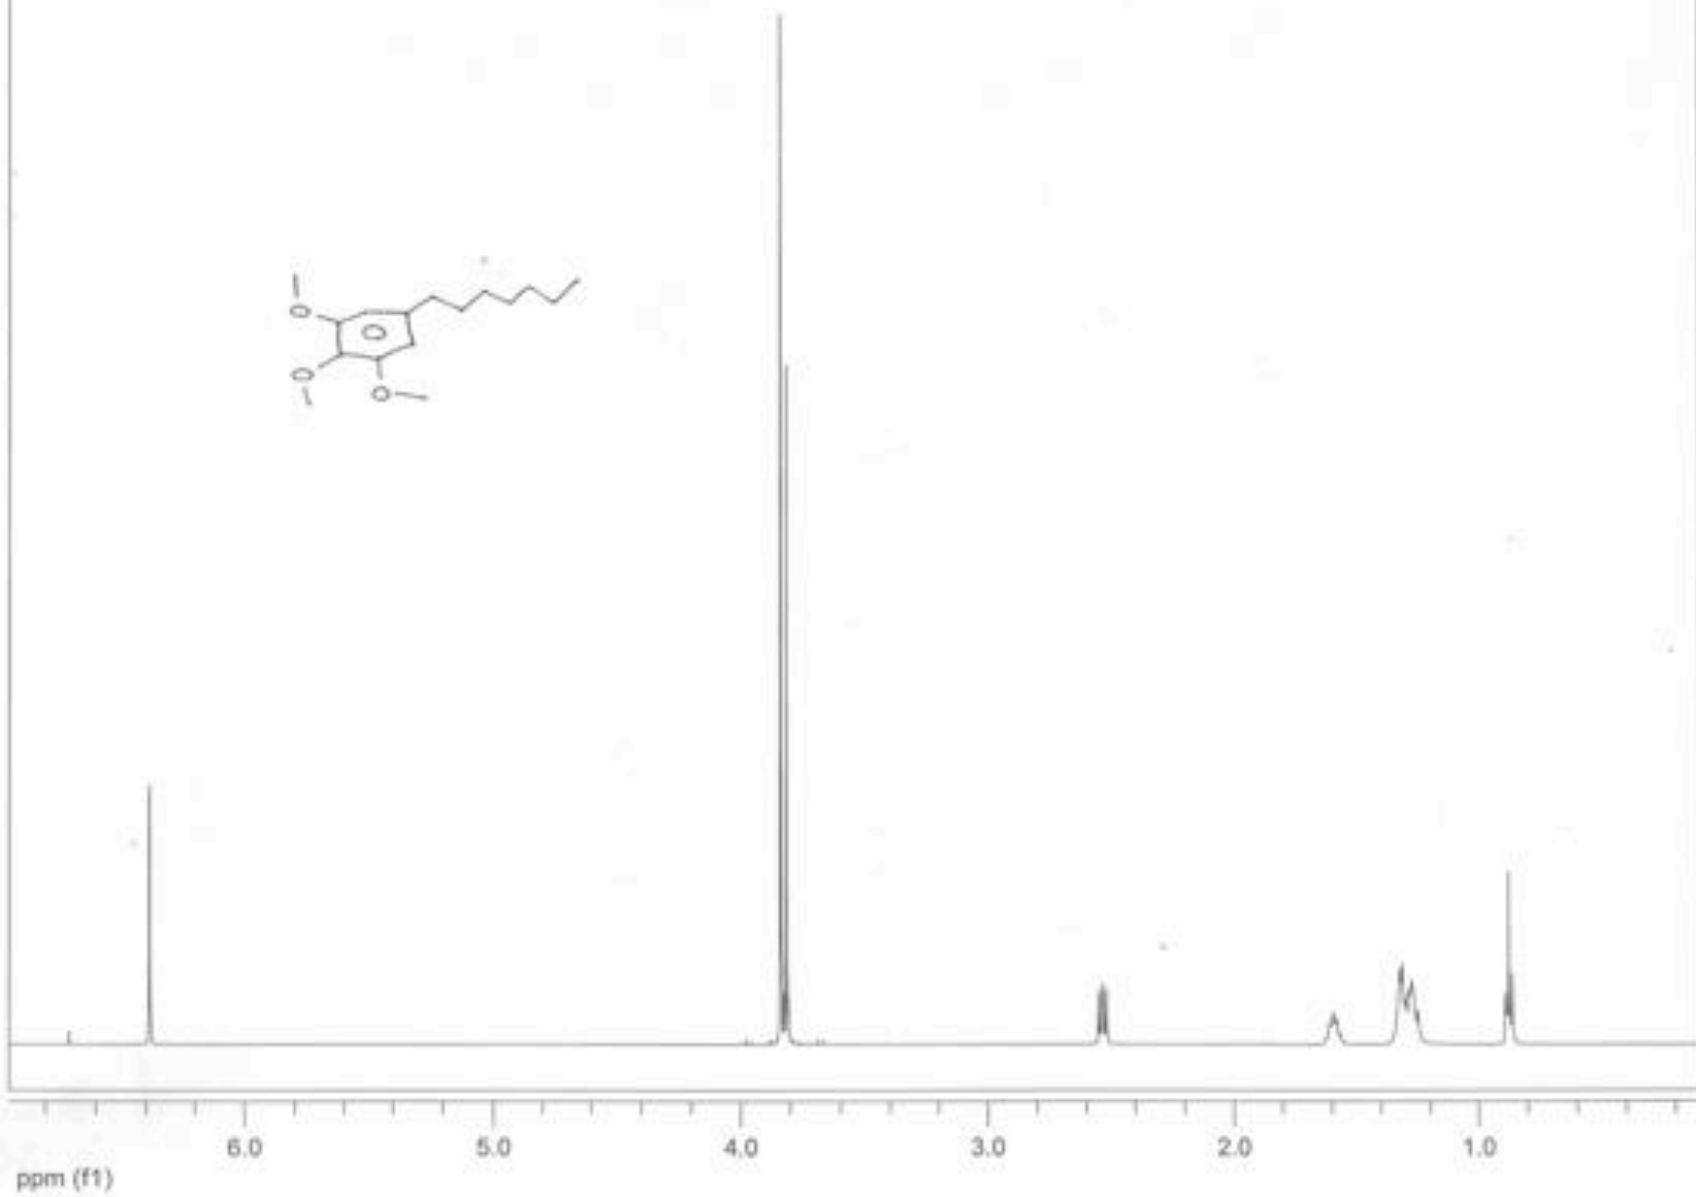

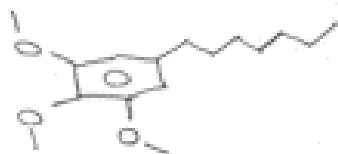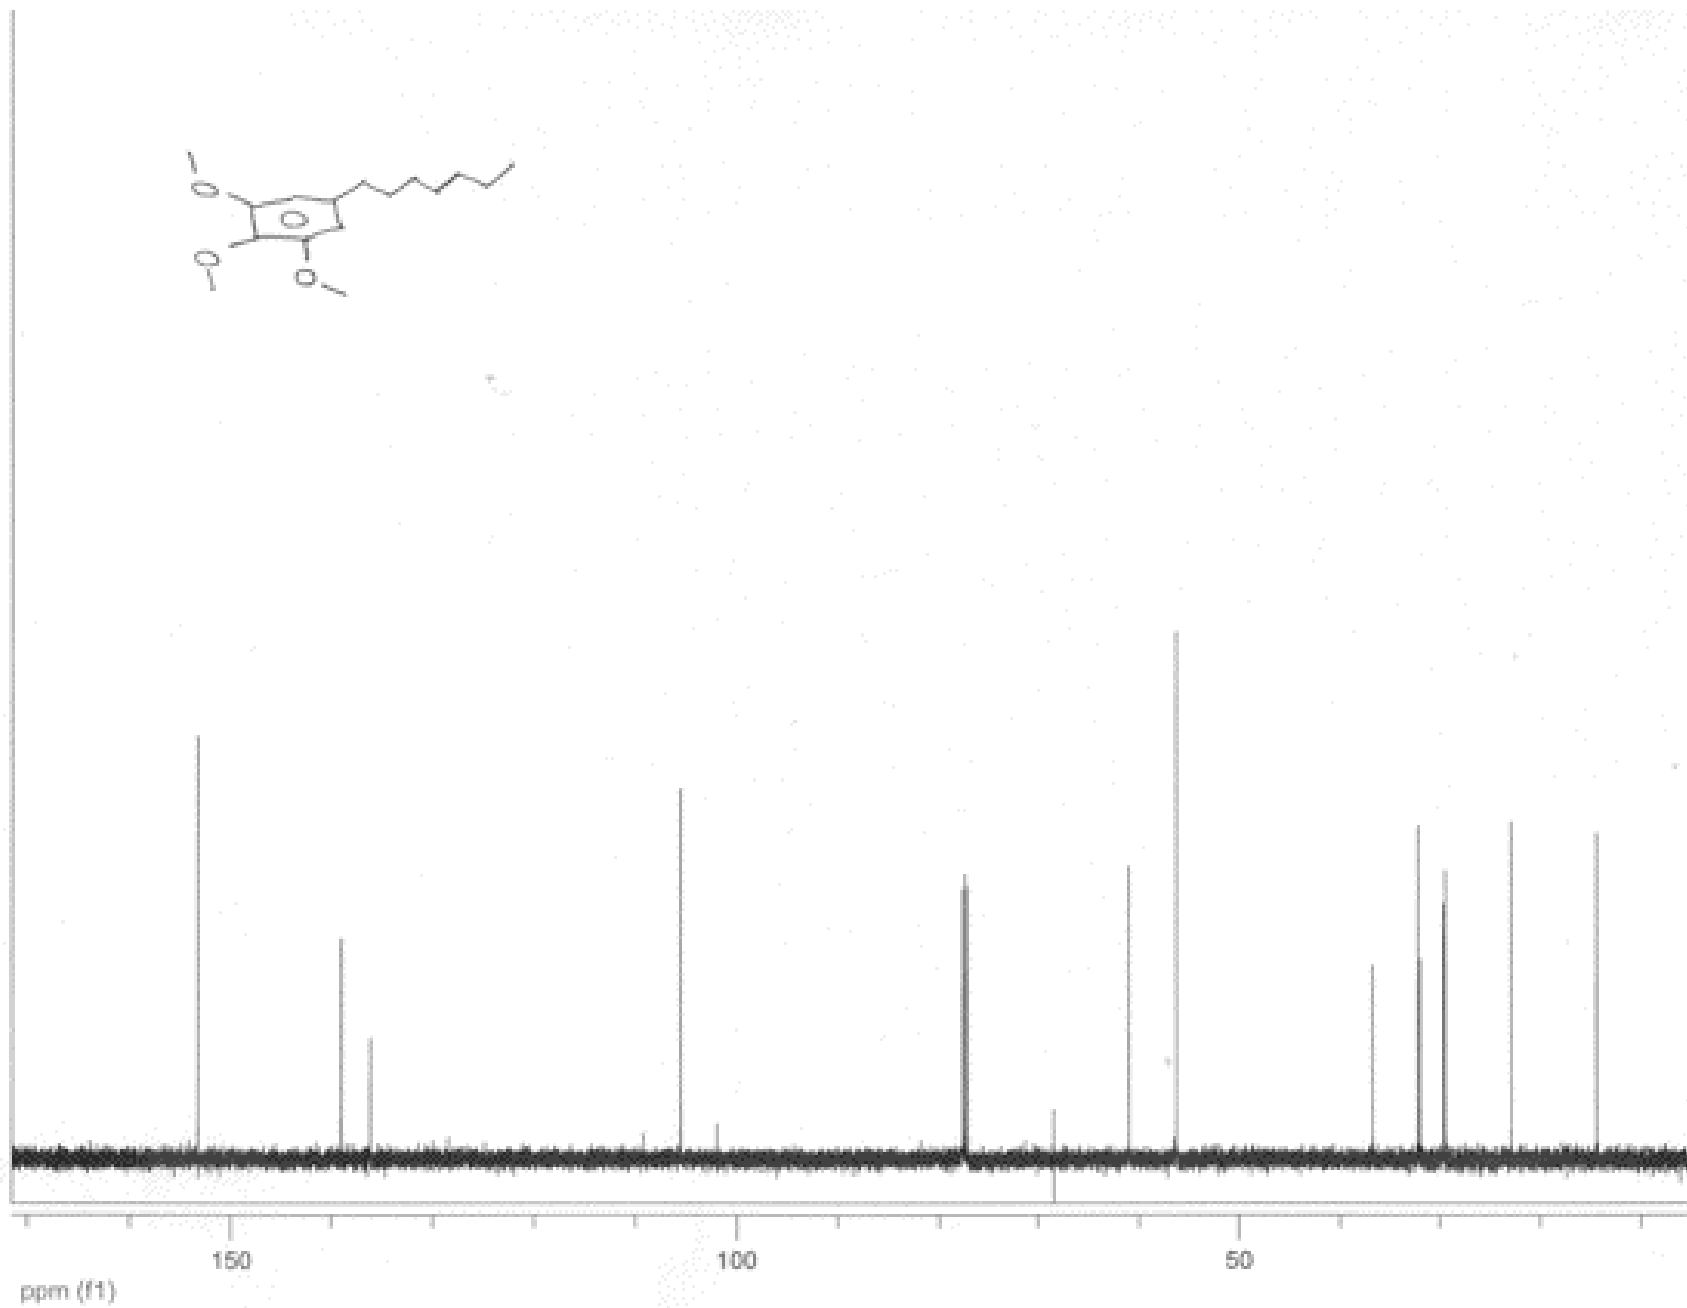

Supplement: NIHMS379425-supplement.pdf [file NIHMS379425-supplement.pdf]
